# Supplementary material for: Locational distribution of gene functional classes in Arabidopsis thaliana
Source: PubMed Central journal article supplement (PMC1855069; doi:10.1186/1471-2105-8-112), 2007-03-30
Supplement: 1471-2105-8-112-S1.pdf [file 1471-2105-8-112-S1.pdf]

# Locational Distribution of Gene Functional Classes in *Arabidopsis thaliana*

## Key to tables

The following list is a full description of the column headings in the tables used in this document.

**Chr** - Chromosome number

**Class** - A number representing the molecular function classification annotated by Gene Ontology

**Std** - Strand (Watson/Crick)

**Orig. Grnwd** - The Greenwood statistic for the distribution of genes on the original chromosomes

**MC Grnwd** - The mean Greenwood statistic for the distributions of genes from 1000 pseudo-randomly generated chromosomes

**SD MC grnwd** - The standard deviation for the above statistic

**Ranking** - The ranking of the original result compared with 1000 simulated results

**Examples** - The number of examples of molecular function class used

| Chr | Class | Std | Orig. Grnwd | MC Grnwd   | SD MC grnwd | Ranking | Examples |
|-----|-------|-----|-------------|------------|-------------|---------|----------|
| 1   | 03824 | W   | 0.00461086  | 0.00345593 | 0.000321756 | 1000    | 872      |
| 1   | 03824 | C   | 0.00428771  | 0.0037403  | 0.000265304 | 940     | 884      |
| 1   | 04871 | W   | 0.0266987   | 0.0272012  | 0.00426267  | 543     | 82       |
| 1   | 04871 | C   | 0.0359752   | 0.0339515  | 0.00627094  | 724     | 67       |
| 1   | 05198 | W   | 0.030008    | 0.0320846  | 0.00512607  | 406     | 68       |
| 1   | 05198 | C   | 0.034087    | 0.039007   | 0.00706869  | 265     | 58       |
| 1   | 05215 | W   | 0.013537    | 0.00962302 | 0.00102992  | 997     | 251      |
| 1   | 05215 | C   | 0.0139946   | 0.0115202  | 0.0014391   | 939     | 217      |
| 1   | 05488 | W   | 0.00517308  | 0.00328976 | 0.00033366  | 1000    | 888      |
| 1   | 05488 | C   | 0.00361528  | 0.00365203 | 0.000259156 | 515     | 916      |
| 1   | 16209 | W   | 0.123493    | 0.15363    | 0.0390906   | 204     | 12       |
| 1   | 16209 | C   | 0.194071    | 0.182619   | 0.0493941   | 702     | 10       |
| 1   | 30234 | W   | 0.125975    | 0.0894086  | 0.0189708   | 956     | 22       |
| 1   | 30234 | C   | 0.102725    | 0.0681844  | 0.0140613   | 977     | 31       |
| 1   | 30528 | W   | 0.0167562   | 0.0102226  | 0.0010794   | 1000    | 236      |
| 1   | 30528 | C   | 0.0132615   | 0.0113704  | 0.00138724  | 904     | 220      |
| 1   | 45182 | W   | 0.0651981   | 0.0720028  | 0.0143043   | 360     | 28       |
| 1   | 45182 | C   | 0.0775567   | 0.100828   | 0.0226898   | 104     | 20       |
| 1   | 45735 | W   | 0.282141    | 0.2374     | 0.0656962   | 805     | 7        |
| 1   | 45735 | C   | 0.109194    | 0.1462     | 0.0382068   | 89      | 13       |

Table 1: Results for gene classes taken from level 1 of the Gene Ontology heirarchy on chromosome 1 using TIGR data with the tandem duplications removed

| Chr | Class | Std | Orig. Grnwd | MC Grnwd   | SD MC grnwd | Ranking | Examples |
|-----|-------|-----|-------------|------------|-------------|---------|----------|
| 2   | 03824 | W   | 0.00493668  | 0.00518015 | 0.000450868 | 283     | 505      |
| 2   | 03824 | C   | 0.00599414  | 0.00461907 | 0.00037109  | 992     | 565      |
| 2   | 04871 | W   | 0.0845108   | 0.0672586  | 0.0153843   | 888     | 32       |
| 2   | 04871 | C   | 0.127841    | 0.0590474  | 0.0134551   | 997     | 37       |
| 2   | 05198 | W   | 0.0453661   | 0.045425   | 0.00901902  | 587     | 50       |
| 2   | 05198 | C   | 0.0466727   | 0.0553937  | 0.0116024   | 227     | 40       |
| 2   | 05215 | W   | 0.0200676   | 0.0161908  | 0.00225987  | 946     | 147      |
| 2   | 05215 | C   | 0.0302128   | 0.018107   | 0.00269904  | 996     | 131      |
| 2   | 05488 | W   | 0.00425628  | 0.00453212 | 0.000386012 | 246     | 608      |
| 2   | 05488 | C   | 0.00436702  | 0.00445364 | 0.00034135  | 449     | 589      |
| 2   | 16209 | W   | 0.192492    | 0.197252   | 0.0474917   | 522     | 9        |
| 2   | 16209 | C   | 0.228358    | 0.212194   | 0.0536405   | 703     | 8        |
| 2   | 30234 | W   | 0.185141    | 0.123328   | 0.0302565   | 956     | 16       |
| 2   | 30234 | C   | 0.142932    | 0.0981309  | 0.0229557   | 948     | 21       |
| 2   | 30528 | W   | 0.0393378   | 0.0172058  | 0.0023468   | 1000    | 137      |
| 2   | 30528 | C   | 0.0558571   | 0.0189399  | 0.00290322  | 1000    | 125      |
| 2   | 45182 | W   | 0.155136    | 0.166668   | 0.0403859   | 440     | 11       |
| 2   | 45182 | C   | 0.138527    | 0.166958   | 0.0398796   | 263     | 11       |
| 2   | 45735 | W   | 0.434175    | 0.3492     | 0.101882    | 846     | 4        |
| 2   | 45735 | C   | 0.233419    | 0.192833   | 0.0493644   | 833     | 9        |

Table 2: Results for gene classes taken from level 1 of the Gene Ontology heirarchy on chromosome 2 using TIGR data with the tandem duplications removed

| Chr | Class | Std | Orig. Grnwd | MC Grnwd   | SD MC grnwd | Ranking | Examples |
|-----|-------|-----|-------------|------------|-------------|---------|----------|
| 3   | 03824 | W   | 0.00746425  | 0.00583099 | 0.000814598 | 977     | 643      |
| 3   | 03824 | C   | 0.00672773  | 0.00540192 | 0.000715543 | 954     | 678      |
| 3   | 04871 | W   | 0.0551221   | 0.0482816  | 0.010014    | 811     | 49       |
| 3   | 04871 | C   | 0.0960669   | 0.0520379  | 0.0117095   | 996     | 47       |
| 3   | 05198 | W   | 0.0425475   | 0.0380615  | 0.00816041  | 781     | 64       |
| 3   | 05198 | C   | 0.055678    | 0.0371552  | 0.00804732  | 964     | 69       |
| 3   | 05215 | W   | 0.0222488   | 0.0185479  | 0.00321253  | 902     | 146      |
| 3   | 05215 | C   | 0.0417299   | 0.0156211  | 0.00277516  | 1000    | 183      |
| 3   | 05488 | W   | 0.00846204  | 0.00574346 | 0.000765179 | 1000    | 659      |
| 3   | 05488 | C   | 0.00760123  | 0.00505556 | 0.000490969 | 1000    | 689      |
| 3   | 16209 | W   | 0.126566    | 0.171025   | 0.0473813   | 128     | 11       |
| 3   | 16209 | C   | 0.149328    | 0.192084   | 0.0553073   | 207     | 10       |
| 3   | 30234 | W   | 0.149969    | 0.101144   | 0.0242922   | 948     | 21       |
| 3   | 30234 | C   | 0.106659    | 0.0906837  | 0.0234184   | 812     | 25       |
| 3   | 30528 | W   | 0.0491048   | 0.0168493  | 0.00263517  | 1000    | 162      |
| 3   | 30528 | C   | 0.0535272   | 0.0197254  | 0.0039783   | 1000    | 141      |
| 3   | 45182 | W   | 0.281498    | 0.225753   | 0.0659261   | 849     | 8        |
| 3   | 45182 | C   | 0.198122    | 0.129569   | 0.0353808   | 956     | 16       |
| 3   | 45735 | W   | 0.298559    | 0.277851   | 0.0772352   | 689     | 6        |
| 3   | 45735 | C   | 0.296933    | 0.16614    | 0.0488654   | 978     | 12       |

Table 3: Results for gene classes taken from level 1 of the Gene Ontology heirarchy on chromosome 3 using TIGR data with the tandem duplications removed

| Chr | Class | Std | Orig. Grnwd | MC Grnwd   | SD MC grnwd | Ranking | Examples |
|-----|-------|-----|-------------|------------|-------------|---------|----------|
| 4   | 03824 | W   | 0.0050018   | 0.00498841 | 0.000377788 | 585     | 500      |
| 4   | 03824 | C   | 0.00538837  | 0.00519956 | 0.00043766  | 669     | 537      |
| 4   | 04871 | W   | 0.0483991   | 0.0484439  | 0.00884644  | 589     | 43       |
| 4   | 04871 | C   | 0.0407367   | 0.0435496  | 0.00878347  | 441     | 51       |
| 4   | 05198 | W   | 0.0552778   | 0.0554576  | 0.0102561   | 585     | 37       |
| 4   | 05198 | C   | 0.0598803   | 0.0602493  | 0.0118551   | 548     | 36       |
| 4   | 05215 | W   | 0.0194584   | 0.0190879  | 0.00244008  | 629     | 117      |
| 4   | 05215 | C   | 0.0258559   | 0.0175382  | 0.00277058  | 980     | 137      |
| 4   | 05488 | W   | 0.00509508  | 0.00471058 | 0.000390767 | 831     | 545      |
| 4   | 05488 | C   | 0.00582023  | 0.00542012 | 0.000408192 | 833     | 514      |
| 4   | 16209 | W   | 0.130003    | 0.140046   | 0.0342328   | 455     | 13       |
| 4   | 16209 | C   | 0.234765    | 0.237411   | 0.0604259   | 572     | 7        |
| 4   | 30234 | W   | 0.114209    | 0.118632   | 0.0260909   | 505     | 16       |
| 4   | 30234 | C   | 0.159594    | 0.211018   | 0.0552698   | 118     | 8        |
| 4   | 30528 | W   | 0.0216402   | 0.0173024  | 0.00228024  | 961     | 130      |
| 4   | 30528 | C   | 0.0293432   | 0.0203354  | 0.00323235  | 979     | 117      |
| 4   | 45182 | W   | 0.149115    | 0.161546   | 0.0400584   | 446     | 11       |
| 4   | 45182 | C   | 0.148636    | 0.154753   | 0.0391065   | 552     | 12       |
| 4   | 45735 | W   | 0.234971    | 0.260521   | 0.071213    | 442     | 6        |
| 4   | 45735 | C   | 0.231433    | 0.26178    | 0.0668359   | 383     | 6        |

Table 4: Results for gene classes taken from level 1 of the Gene Ontology heirarchy on chromosome 4 using TIGR data with the tandem duplications removed

| Chr | Class | Std | Orig. Grnwd | MC Grnwd   | SD MC grnwd | Ranking | Examples |
|-----|-------|-----|-------------|------------|-------------|---------|----------|
| 5   | 03824 | W   | 0.00470506  | 0.00374654 | 0.000359107 | 980     | 756      |
| 5   | 03824 | C   | 0.00741941  | 0.00368441 | 0.000372623 | 1000    | 783      |
| 5   | 04871 | W   | 0.0327333   | 0.0290924  | 0.00574659  | 795     | 81       |
| 5   | 04871 | C   | 0.0362551   | 0.0398035  | 0.00895303  | 422     | 61       |
| 5   | 05198 | W   | 0.0455819   | 0.0392262  | 0.00769359  | 833     | 58       |
| 5   | 05198 | C   | 0.0386574   | 0.0384007  | 0.00822679  | 628     | 63       |
| 5   | 05215 | W   | 0.0144524   | 0.0130435  | 0.0022869   | 812     | 191      |
| 5   | 05215 | C   | 0.0217139   | 0.0126649  | 0.00248345  | 987     | 209      |
| 5   | 05488 | W   | 0.00420059  | 0.00341291 | 0.000251068 | 979     | 862      |
| 5   | 05488 | C   | 0.00400692  | 0.00338991 | 0.000343469 | 948     | 866      |
| 5   | 16209 | W   | 0.212407    | 0.244203   | 0.076583    | 408     | 7        |
| 5   | 16209 | C   | 0.122518    | 0.113782   | 0.0272106   | 721     | 18       |
| 5   | 30234 | W   | 0.140406    | 0.117355   | 0.0280249   | 848     | 17       |
| 5   | 30234 | C   | 0.10396     | 0.0925238  | 0.0203716   | 767     | 23       |
| 5   | 30528 | W   | 0.0282562   | 0.0116901  | 0.00161739  | 1000    | 213      |
| 5   | 30528 | C   | 0.0144269   | 0.0125376  | 0.00244378  | 796     | 211      |
| 5   | 45182 | W   | 0.111221    | 0.103659   | 0.0252331   | 708     | 20       |
| 5   | 45182 | C   | 0.0835833   | 0.0994304  | 0.0217667   | 240     | 21       |
| 5   | 45735 | W   | 0.205942    | 0.218595   | 0.0618135   | 521     | 8        |
| 5   | 45735 | C   | 0.109241    | 0.128322   | 0.033335    | 320     | 16       |

Table 5: Results for gene classes taken from level 1 of the Gene Ontology heirarchy on chromosome 5 using TIGR data with the tandem duplications removed

| Chr | Class | Std | Orig. Grnwd | MC Grnwd   | SD MC grnwd | Ranking | Examples |
|-----|-------|-----|-------------|------------|-------------|---------|----------|
| 1   | 00166 | W   | 0.0107258   | 0.00937975 | 0.00102211  | 891     | 258      |
| 1   | 00166 | C   | 0.0129371   | 0.00863453 | 0.000971031 | 1000    | 301      |
| 1   | 03676 | W   | 0.00883573  | 0.00583013 | 0.000557914 | 1000    | 441      |
| 1   | 03676 | C   | 0.00627288  | 0.00602496 | 0.000603791 | 719     | 461      |
| 1   | 03700 | W   | 0.0170799   | 0.0107792  | 0.00131015  | 1000    | 224      |
| 1   | 03700 | C   | 0.0134604   | 0.0121163  | 0.00160345  | 840     | 207      |
| 1   | 03735 | W   | 0.0396305   | 0.0448146  | 0.00736639  | 249     | 48       |
| 1   | 03735 | C   | 0.0382082   | 0.0501455  | 0.00941507  | 46      | 43       |
| 1   | 03754 | W   | 0.082164    | 0.07455    | 0.013918    | 750     | 27       |
| 1   | 03754 | C   | 0.0564661   | 0.0556431  | 0.0106559   | 611     | 39       |
| 1   | 03793 | W   | 0.139116    | 0.0967526  | 0.0197183   | 964     | 20       |
| 1   | 03793 | C   | 0.100602    | 0.110653   | 0.0255398   | 409     | 18       |
| 1   | 04386 | W   | 0.154128    | 0.102456   | 0.0217551   | 967     | 19       |
| 1   | 04386 | C   | 0.0724309   | 0.0646965  | 0.0128912   | 775     | 33       |
| 1   | 04857 | W   | 0.189537    | 0.142903   | 0.0363572   | 917     | 13       |
| 1   | 04857 | C   | 0.151728    | 0.111908   | 0.0252016   | 926     | 18       |
| 1   | 04872 | W   | 0.0542422   | 0.0447582  | 0.00787169  | 901     | 48       |
| 1   | 04872 | C   | 0.0502293   | 0.0521483  | 0.0107102   | 509     | 42       |
| 1   | 05386 | W   | 0.0317418   | 0.0232466  | 0.00346521  | 970     | 98       |
| 1   | 05386 | C   | 0.0274814   | 0.0261488  | 0.00443165  | 710     | 89       |
| 1   | 05489 | W   | 0.0396485   | 0.0400886  | 0.00665184  | 535     | 54       |
| 1   | 05489 | C   | 0.0435345   | 0.0468206  | 0.00883886  | 409     | 47       |
| 1   | 05515 | W   | 0.0237995   | 0.0216625  | 0.00311658  | 798     | 105      |
| 1   | 05515 | C   | 0.0200567   | 0.0196699  | 0.00295315  | 629     | 121      |
| 1   | 08135 | W   | 0.0651981   | 0.0726647  | 0.0142764   | 327     | 28       |
| 1   | 08135 | C   | 0.0775567   | 0.100526   | 0.0229796   | 105     | 20       |
| 1   | 08289 | W   | 0.0839434   | 0.117092   | 0.0263293   | 29      | 16       |
| 1   | 08289 | C   | 0.16031     | 0.145564   | 0.0377233   | 736     | 13       |
| 1   | 08565 | W   | 0.126357    | 0.0942259  | 0.0200566   | 937     | 21       |
| 1   | 08565 | C   | 0.139498    | 0.135878   | 0.0348166   | 651     | 14       |
| 1   | 15034 | W   | 0.112825    | 0.0976714  | 0.0212671   | 826     | 20       |
| 1   | 15034 | C   | 0.0914775   | 0.111378   | 0.027302    | 226     | 18       |
| 1   | 15075 | W   | 0.0602414   | 0.0434953  | 0.00752369  | 960     | 49       |
| 1   | 15075 | C   | 0.0680512   | 0.0493716  | 0.00901085  | 959     | 44       |
| 1   | 15144 | W   | 0.132551    | 0.125244   | 0.0285356   | 688     | 15       |
| 1   | 15144 | C   | 0.2241      | 0.0964325  | 0.0217541   | 998     | 21       |
| 1   | 15267 | W   | 0.120784    | 0.14178    | 0.0360506   | 296     | 13       |
| 1   | 15267 | C   | 0.169791    | 0.127789   | 0.0307377   | 921     | 15       |
| 1   | 16491 | W   | 0.0150151   | 0.0148735  | 0.00193802  | 622     | 156      |
| 1   | 16491 | C   | 0.0202212   | 0.0181181  | 0.00266202  | 787     | 132      |
| 1   | 16740 | W   | 0.0145807   | 0.00834435 | 0.000850983 | 1000    | 293      |
| 1   | 16740 | C   | 0.0130997   | 0.00919653 | 0.00102678  | 998     | 279      |
| 1   | 16787 | W   | 0.0119745   | 0.00811257 | 0.000836808 | 1000    | 303      |
| 1   | 16787 | C   | 0.00959217  | 0.0081276  | 0.000885949 | 938     | 323      |
| 1   | 16829 | W   | 0.0637395   | 0.0515665  | 0.00934176  | 904     | 41       |
| 1   | 16829 | C   | 0.056659    | 0.0441453  | 0.00802875  | 923     | 50       |
| 1   | 16853 | W   | 0.0598458   | 0.056515   | 0.010327    | 708     | 37       |
| 1   | 16853 | C   | 0.0540784   | 0.063066   | 0.0133762   | 264     | 34       |
| 1   | 16874 | W   | 0.0488572   | 0.0579512  | 0.0107939   | 169     | 36       |
| 1   | 16874 | C   | 0.0669417   | 0.0742597  | 0.0162767   | 357     | 28       |
| 1   | 19825 | W   | 0.097452    | 0.097467   | 0.0207345   | 584     | 20       |
| 1   | 19825 | C   | 0.0892372   | 0.109385   | 0.0248307   | 200     | 18       |

Table 6: Results for gene classes taken from level 2 of the Gene Ontology heirarchy on chromosome 1 using TIGR data with the tandem duplications removed

| Chr | Class | Std | Orig. Grnwd | MC Grnwd   | SD MC grnwd | Ranking | Examples |
|-----|-------|-----|-------------|------------|-------------|---------|----------|
| 2   | 00166 | W   | 0.0120941   | 0.0138655  | 0.00194106  | 137     | 174      |
| 2   | 00166 | C   | 0.0145925   | 0.0138498  | 0.00194909  | 719     | 173      |
| 2   | 03676 | W   | 0.00666209  | 0.00746938 | 0.000772488 | 107     | 337      |
| 2   | 03676 | C   | 0.00708366  | 0.00780332 | 0.000922006 | 200     | 326      |
| 2   | 03700 | W   | 0.0394401   | 0.0181264  | 0.00274863  | 999     | 130      |
| 2   | 03700 | C   | 0.0561825   | 0.0199386  | 0.0031745   | 1000    | 118      |
| 2   | 03735 | W   | 0.0510885   | 0.0535256  | 0.0113382   | 498     | 41       |
| 2   | 03735 | C   | 0.0748701   | 0.0731439  | 0.0160671   | 651     | 29       |
| 2   | 03754 | W   | 0.21383     | 0.117079   | 0.0285792   | 991     | 17       |
| 2   | 03754 | C   | 0.136785    | 0.131422   | 0.0321473   | 653     | 15       |
| 2   | 03793 | W   | 0.440455    | 0.345091   | 0.0962091   | 852     | 4        |
| 2   | 03793 | C   | 0.311615    | 0.33592    | 0.0848267   | 449     | 4        |
| 2   | 04386 | W   | 0.108975    | 0.139285   | 0.0344028   | 168     | 14       |
| 2   | 04386 | C   | 0.274744    | 0.167198   | 0.0403137   | 977     | 11       |
| 2   | 04857 | W   | 0.24701     | 0.196816   | 0.0498654   | 862     | 9        |
| 2   | 04857 | C   | 0.179946    | 0.146809   | 0.0376253   | 843     | 13       |
| 2   | 04872 | W   | 0.128379    | 0.106413   | 0.0245292   | 833     | 19       |
| 2   | 04872 | C   | 0.142208    | 0.0931953  | 0.0227478   | 959     | 22       |
| 2   | 05386 | W   | 0.0498991   | 0.0444904  | 0.00895837  | 814     | 50       |
| 2   | 05386 | C   | 0.0595119   | 0.0399326  | 0.00800476  | 975     | 56       |
| 2   | 05489 | W   | 0.0627677   | 0.0681163  | 0.0151927   | 421     | 32       |
| 2   | 05489 | C   | 0.0825069   | 0.0798037  | 0.0183442   | 645     | 27       |
| 2   | 05515 | W   | 0.068128    | 0.0338404  | 0.00592966  | 1000    | 67       |
| 2   | 05515 | C   | 0.0725999   | 0.0347042  | 0.00671814  | 999     | 66       |
| 2   | 08135 | W   | 0.155136    | 0.165098   | 0.0416062   | 484     | 11       |
| 2   | 08135 | C   | 0.138527    | 0.166002   | 0.0417856   | 268     | 11       |
| 2   | 08289 | W   | 0.192819    | 0.198526   | 0.0498995   | 542     | 9        |
| 2   | 08289 | C   | 0.311287    | 0.297822   | 0.0791541   | 653     | 5        |
| 2   | 08565 | W   | 0.242899    | 0.181196   | 0.042781    | 914     | 10       |
| 2   | 08565 | C   | 0.164953    | 0.137176   | 0.0329595   | 825     | 14       |
| 2   | 15034 | W   | 0.211733    | 0.136878   | 0.0315354   | 974     | 14       |
| 2   | 15034 | C   | 0.155726    | 0.123769   | 0.0296685   | 866     | 16       |
| 2   | 15075 | W   | 0.0647434   | 0.0740739  | 0.0162051   | 320     | 29       |
| 2   | 15075 | C   | 0.124802    | 0.0875377  | 0.0202259   | 940     | 24       |
| 2   | 15144 | W   | 0.248186    | 0.267142   | 0.0687964   | 473     | 6        |
| 2   | 15144 | C   | 0.0932863   | 0.145517   | 0.0365054   | 11      | 13       |
| 2   | 15267 | W   | 0.121633    | 0.131592   | 0.0304631   | 439     | 15       |
| 2   | 15267 | C   | 0.273804    | 0.197277   | 0.0504965   | 930     | 9        |
| 2   | 16491 | W   | 0.0429582   | 0.0347538  | 0.00686123  | 903     | 66       |
| 2   | 16491 | C   | 0.0394562   | 0.0321105  | 0.0059126   | 902     | 71       |
| 2   | 16740 | W   | 0.0140019   | 0.0125648  | 0.00167913  | 847     | 193      |
| 2   | 16740 | C   | 0.0100147   | 0.0117611  | 0.00146531  | 72      | 207      |
| 2   | 16787 | W   | 0.0109255   | 0.0126858  | 0.00169714  | 88      | 191      |
| 2   | 16787 | C   | 0.0158142   | 0.0112878  | 0.00146346  | 987     | 214      |
| 2   | 16829 | W   | 0.0929941   | 0.0806471  | 0.018556    | 801     | 26       |
| 2   | 16829 | C   | 0.142105    | 0.0678035  | 0.014861    | 997     | 32       |
| 2   | 16853 | W   | 0.138935    | 0.139434   | 0.0340804   | 597     | 14       |
| 2   | 16853 | C   | 0.14666     | 0.101124   | 0.0243464   | 940     | 20       |
| 2   | 16874 | W   | 0.126924    | 0.0974982  | 0.0229079   | 881     | 21       |
| 2   | 16874 | C   | 0.0955882   | 0.106161   | 0.0247493   | 397     | 19       |
| 2   | 19825 | W   | 0.211733    | 0.13867    | 0.0341782   | 970     | 14       |
| 2   | 19825 | C   | 0.133188    | 0.122226   | 0.0288378   | 715     | 16       |

Table 7: Results for gene classes taken from level 2 of the Gene Ontology heirarchy on chromosome 2 using TIGR data with the tandem duplications removed

| Chr | Class | Std | Orig. Grnwd | MC Grnwd   | SD MC grnwd | Ranking | Examples |
|-----|-------|-----|-------------|------------|-------------|---------|----------|
| 3   | 00166 | W   | 0.0150251   | 0.0128967  | 0.00184559  | 892     | 223      |
| 3   | 00166 | C   | 0.0169452   | 0.0125978  | 0.00212673  | 968     | 215      |
| 3   | 03676 | W   | 0.0193296   | 0.00996196 | 0.00130052  | 1000    | 307      |
| 3   | 03676 | C   | 0.0170507   | 0.00925041 | 0.00134523  | 1000    | 337      |
| 3   | 03700 | W   | 0.0492682   | 0.0179707  | 0.00294462  | 1000    | 151      |
| 3   | 03700 | C   | 0.0544014   | 0.0206394  | 0.00416924  | 1000    | 135      |
| 3   | 03735 | W   | 0.0821085   | 0.0498291  | 0.0108361   | 983     | 47       |
| 3   | 03735 | C   | 0.0614972   | 0.0492735  | 0.0109175   | 876     | 50       |
| 3   | 03754 | W   | 0.128367    | 0.0848729  | 0.0216931   | 956     | 26       |
| 3   | 03754 | C   | 0.174207    | 0.100247   | 0.0249277   | 983     | 22       |
| 3   | 03793 | W   | 0.692063    | 0.698654   | 0.1467      | 520     | 1        |
| 3   | 03793 | C   | 0.208939    | 0.255625   | 0.0750361   | 320     | 7        |
| 3   | 04386 | W   | 0.242068    | 0.120054   | 0.0304329   | 995     | 17       |
| 3   | 04386 | C   | 0.10462     | 0.125315   | 0.0337524   | 299     | 17       |
| 3   | 04857 | W   | 0.198285    | 0.162657   | 0.0453965   | 829     | 12       |
| 3   | 04857 | C   | 0.240999    | 0.154312   | 0.0420038   | 956     | 13       |
| 3   | 04872 | W   | 0.110363    | 0.0793271  | 0.0188017   | 929     | 28       |
| 3   | 04872 | C   | 0.11981     | 0.100426   | 0.0261102   | 833     | 22       |
| 3   | 05386 | W   | 0.0666984   | 0.0535273  | 0.0124187   | 880     | 44       |
| 3   | 05386 | C   | 0.0513102   | 0.0356247  | 0.00771152  | 952     | 72       |
| 3   | 05489 | W   | 0.0580403   | 0.0546816  | 0.0133442   | 717     | 43       |
| 3   | 05489 | C   | 0.0924093   | 0.054163   | 0.0121947   | 990     | 44       |
| 3   | 05515 | W   | 0.0343056   | 0.0272103  | 0.00492473  | 914     | 93       |
| 3   | 05515 | C   | 0.0306511   | 0.0271684  | 0.00599417  | 795     | 99       |
| 3   | 08135 | W   | 0.281498    | 0.222765   | 0.0624056   | 855     | 8        |
| 3   | 08135 | C   | 0.198122    | 0.12951    | 0.0329998   | 963     | 16       |
| 3   | 08289 | W   | 0.49036     | 0.362963   | 0.102025    | 889     | 4        |
| 3   | 08289 | C   | 0.165608    | 0.145065   | 0.0405642   | 775     | 14       |
| 3   | 08565 | W   | 0.193263    | 0.161309   | 0.040286    | 814     | 12       |
| 3   | 08565 | C   | 0.127085    | 0.112153   | 0.0289605   | 783     | 19       |
| 3   | 15034 | W   | 0.178703    | 0.150349   | 0.0423305   | 817     | 13       |
| 3   | 15034 | C   | 0.116053    | 0.146729   | 0.0411603   | 223     | 14       |
| 3   | 15075 | W   | 0.0983476   | 0.0977602  | 0.0252346   | 604     | 22       |
| 3   | 15075 | C   | 0.0785358   | 0.0527191  | 0.0122656   | 958     | 46       |
| 3   | 15144 | W   | 0.27218     | 0.220952   | 0.0626298   | 840     | 8        |
| 3   | 15144 | C   | 0.23447     | 0.145341   | 0.0399757   | 967     | 14       |
| 3   | 15267 | W   | 0.113042    | 0.150383   | 0.0405381   | 130     | 13       |
| 3   | 15267 | C   | 0.248785    | 0.22389    | 0.0625603   | 733     | 8        |
| 3   | 16491 | W   | 0.0357018   | 0.0264013  | 0.00489884  | 953     | 96       |
| 3   | 16491 | C   | 0.0299024   | 0.0299587  | 0.00636557  | 597     | 86       |
| 3   | 16740 | W   | 0.0251587   | 0.0137798  | 0.00199968  | 996     | 201      |
| 3   | 16740 | C   | 0.0192089   | 0.0147304  | 0.00255908  | 934     | 195      |
| 3   | 16787 | W   | 0.0136099   | 0.0118464  | 0.00167866  | 878     | 245      |
| 3   | 16787 | C   | 0.0130666   | 0.0106046  | 0.00140157  | 943     | 261      |
| 3   | 16829 | W   | 0.105143    | 0.0592663  | 0.0139266   | 990     | 39       |
| 3   | 16829 | C   | 0.0936301   | 0.0590276  | 0.0139352   | 974     | 41       |
| 3   | 16853 | W   | 0.153735    | 0.0841485  | 0.0200694   | 992     | 26       |
| 3   | 16853 | C   | 0.0974768   | 0.0767759  | 0.0188336   | 876     | 30       |
| 3   | 16874 | W   | 0.159735    | 0.0964863  | 0.0236703   | 979     | 22       |
| 3   | 16874 | C   | 0.0838723   | 0.0733686  | 0.0186595   | 786     | 32       |
| 3   | 19825 | W   | 0.113484    | 0.140931   | 0.0376668   | 226     | 14       |
| 3   | 19825 | C   | 0.120244    | 0.15608    | 0.0451583   | 187     | 13       |

Table 8: Results for gene classes taken from level 2 of the Gene Ontology heirarchy on chromosome 3 using TIGR data with the tandem duplications removed

| Chr | Class | Std | Orig. Grnwd | MC Grnwd   | SD MC grnwd | Ranking | Examples |
|-----|-------|-----|-------------|------------|-------------|---------|----------|
| 4   | 00166 | W   | 0.0162266   | 0.0141836  | 0.00153174  | 891     | 161      |
| 4   | 00166 | C   | 0.0133603   | 0.015613   | 0.00236995  | 114     | 156      |
| 4   | 03676 | W   | 0.0100103   | 0.00865673 | 0.000769678 | 946     | 271      |
| 4   | 03676 | C   | 0.0101189   | 0.00982037 | 0.00128182  | 710     | 258      |
| 4   | 03700 | W   | 0.0231701   | 0.0185406  | 0.00226592  | 959     | 120      |
| 4   | 03700 | C   | 0.0312043   | 0.0216811  | 0.00358336  | 974     | 109      |
| 4   | 03735 | W   | 0.0967996   | 0.0827177  | 0.0187241   | 841     | 24       |
| 4   | 03735 | C   | 0.114467    | 0.0891891  | 0.0198727   | 899     | 23       |
| 4   | 03754 | W   | 0.132303    | 0.113325   | 0.0270486   | 816     | 17       |
| 4   | 03754 | C   | 0.0964538   | 0.137028   | 0.0317815   | 42      | 14       |
| 4   | 03793 | W   | 0.176233    | 0.150833   | 0.0362954   | 809     | 12       |
| 4   | 03793 | C   | 0.142791    | 0.136258   | 0.0319889   | 663     | 14       |
| 4   | 04386 | W   | 0.128754    | 0.163232   | 0.0412364   | 167     | 11       |
| 4   | 04386 | C   | 0.287412    | 0.263527   | 0.0708856   | 725     | 6        |
| 4   | 04857 | W   | 0.254984    | 0.256732   | 0.0668623   | 588     | 6        |
| 4   | 04857 | C   | 0.381647    | 0.403214   | 0.107171    | 506     | 3        |
| 4   | 04872 | W   | 0.054522    | 0.0650309  | 0.0125094   | 188     | 31       |
| 4   | 04872 | C   | 0.0553316   | 0.0608396  | 0.0122822   | 385     | 35       |
| 4   | 05386 | W   | 0.0455547   | 0.0477932  | 0.00846805  | 455     | 44       |
| 4   | 05386 | C   | 0.0664276   | 0.0480133  | 0.00972745  | 946     | 46       |
| 4   | 05489 | W   | 0.0509371   | 0.0535     | 0.0101575   | 463     | 39       |
| 4   | 05489 | C   | 0.0595786   | 0.0559469  | 0.0112029   | 716     | 39       |
| 4   | 05515 | W   | 0.0498539   | 0.0395684  | 0.00643584  | 937     | 53       |
| 4   | 05515 | C   | 0.0390918   | 0.0334943  | 0.00603047  | 860     | 67       |
| 4   | 08135 | W   | 0.149115    | 0.161563   | 0.0379221   | 433     | 11       |
| 4   | 08135 | C   | 0.148636    | 0.154628   | 0.0385351   | 522     | 12       |
| 4   | 08289 | W   | 0.152105    | 0.133703   | 0.0302301   | 778     | 14       |
| 4   | 08289 | C   | 0.227056    | 0.151784   | 0.0374692   | 960     | 12       |
| 4   | 08565 | W   | 0.16519     | 0.210706   | 0.0547764   | 186     | 8        |
| 4   | 08565 | C   | 0.14776     | 0.191958   | 0.0472044   | 133     | 9        |
| 4   | 15034 | W   | 0.199733    | 0.125047   | 0.0309225   | 972     | 15       |
| 4   | 15034 | C   | 0.226662    | 0.176564   | 0.0414653   | 895     | 10       |
| 4   | 15075 | W   | 0.0698339   | 0.0890899  | 0.0184024   | 109     | 22       |
| 4   | 15075 | C   | 0.115726    | 0.0849851  | 0.0178984   | 939     | 24       |
| 4   | 15144 | W   | 0.183592    | 0.228376   | 0.05971     | 215     | 7        |
| 4   | 15144 | C   | 0.16285     | 0.210408   | 0.0542087   | 143     | 8        |
| 4   | 15267 | W   | 0.224898    | 0.150683   | 0.0367392   | 965     | 12       |
| 4   | 15267 | C   | 0.163498    | 0.144828   | 0.0341622   | 752     | 13       |
| 4   | 16491 | W   | 0.0225098   | 0.0257414  | 0.00372175  | 156     | 85       |
| 4   | 16491 | C   | 0.0308966   | 0.0272853  | 0.00454996  | 814     | 85       |
| 4   | 16740 | W   | 0.0149445   | 0.0130421  | 0.00128686  | 932     | 173      |
| 4   | 16740 | C   | 0.0166462   | 0.0157739  | 0.00238388  | 730     | 154      |
| 4   | 16787 | W   | 0.0127713   | 0.0128543  | 0.00141491  | 540     | 180      |
| 4   | 16787 | C   | 0.0194318   | 0.0122846  | 0.00175734  | 990     | 202      |
| 4   | 16829 | W   | 0.0712519   | 0.0895783  | 0.0188815   | 135     | 22       |
| 4   | 16829 | C   | 0.149617    | 0.0684695  | 0.0145365   | 1000    | 31       |
| 4   | 16853 | W   | 0.173571    | 0.141627   | 0.0364694   | 854     | 13       |
| 4   | 16853 | C   | 0.0992826   | 0.0964113  | 0.0211939   | 646     | 21       |
| 4   | 16874 | W   | 0.0814678   | 0.0932682  | 0.0201482   | 294     | 21       |
| 4   | 16874 | C   | 0.0740432   | 0.0891636  | 0.0208811   | 230     | 23       |
| 4   | 19825 | W   | 0.200097    | 0.149703   | 0.0345069   | 921     | 12       |
| 4   | 19825 | C   | 0.227205    | 0.194447   | 0.0479438   | 805     | 9        |

Table 9: Results for gene classes taken from level 2 of the Gene Ontology heirarchy on chromosome 4 using TIGR data with the tandem duplications removed

| Chr | Class | Std | Orig. Grnwd | MC Grnwd   | SD MC grnwd | Ranking | Examples |
|-----|-------|-----|-------------|------------|-------------|---------|----------|
| 5   | 00166 | W   | 0.0171599   | 0.00963764 | 0.00178565  | 987     | 267      |
| 5   | 00166 | C   | 0.0159983   | 0.00972401 | 0.00165804  | 992     | 277      |
| 5   | 03676 | W   | 0.00784552  | 0.006113   | 0.000996244 | 933     | 439      |
| 5   | 03676 | C   | 0.00583458  | 0.00641422 | 0.000855619 | 295     | 426      |
| 5   | 03700 | W   | 0.0283576   | 0.0122214  | 0.00215929  | 1000    | 205      |
| 5   | 03700 | C   | 0.0188692   | 0.0138402  | 0.00253511  | 948     | 191      |
| 5   | 03735 | W   | 0.0748125   | 0.0550829  | 0.0118006   | 926     | 41       |
| 5   | 03735 | C   | 0.0451762   | 0.0486394  | 0.0102796   | 445     | 48       |
| 5   | 03754 | W   | 0.076464    | 0.0608605  | 0.0129899   | 883     | 36       |
| 5   | 03754 | C   | 0.0630745   | 0.0653014  | 0.0139664   | 521     | 35       |
| 5   | 03793 | W   | 0.104764    | 0.0720973  | 0.0164544   | 958     | 30       |
| 5   | 03793 | C   | 0.112627    | 0.0931866  | 0.0215842   | 839     | 23       |
| 5   | 04386 | W   | 0.137231    | 0.101844   | 0.0233527   | 918     | 20       |
| 5   | 04386 | C   | 0.0921482   | 0.0935801  | 0.0217333   | 538     | 23       |
| 5   | 04857 | W   | 0.190225    | 0.19936    | 0.0555256   | 540     | 9        |
| 5   | 04857 | C   | 0.196175    | 0.200091   | 0.0538125   | 553     | 9        |
| 5   | 04872 | W   | 0.043182    | 0.041523   | 0.00849614  | 661     | 55       |
| 5   | 04872 | C   | 0.102719    | 0.0648648  | 0.0140313   | 986     | 35       |
| 5   | 05386 | W   | 0.034037    | 0.0328198  | 0.00646322  | 670     | 71       |
| 5   | 05386 | C   | 0.0446296   | 0.0312793  | 0.00653988  | 953     | 79       |
| 5   | 05489 | W   | 0.0853934   | 0.0452741  | 0.00922753  | 998     | 50       |
| 5   | 05489 | C   | 0.0719073   | 0.0549533  | 0.0124121   | 903     | 42       |
| 5   | 05515 | W   | 0.0354366   | 0.019366   | 0.00366596  | 996     | 126      |
| 5   | 05515 | C   | 0.0421771   | 0.0230558  | 0.00487118  | 996     | 111      |
| 5   | 08135 | W   | 0.111221    | 0.103082   | 0.0258864   | 722     | 20       |
| 5   | 08135 | C   | 0.0835833   | 0.102263   | 0.0263908   | 246     | 21       |
| 5   | 08289 | W   | 0.119533    | 0.102295   | 0.024839    | 815     | 20       |
| 5   | 08289 | C   | 0.314204    | 0.134596   | 0.0335815   | 1000    | 15       |
| 5   | 08565 | W   | 0.130795    | 0.117804   | 0.0282588   | 751     | 17       |
| 5   | 08565 | C   | 0.153383    | 0.160563   | 0.043315    | 534     | 12       |
| 5   | 15034 | W   | 0.13216     | 0.147834   | 0.0400977   | 409     | 13       |
| 5   | 15034 | C   | 0.113269    | 0.0893003  | 0.0210844   | 883     | 24       |
| 5   | 15075 | W   | 0.0638186   | 0.0786285  | 0.016819    | 170     | 27       |
| 5   | 15075 | C   | 0.0835628   | 0.0510038  | 0.0114056   | 979     | 46       |
| 5   | 15144 | W   | 0.124376    | 0.120329   | 0.0310194   | 660     | 17       |
| 5   | 15144 | C   | 0.166513    | 0.186392   | 0.0522273   | 426     | 10       |
| 5   | 15267 | W   | 0.108888    | 0.148349   | 0.038589    | 79      | 13       |
| 5   | 15267 | C   | 0.0868651   | 0.0858772  | 0.0192674   | 617     | 25       |
| 5   | 16491 | W   | 0.0260669   | 0.0209664  | 0.004027    | 899     | 116      |
| 5   | 16491 | C   | 0.0233869   | 0.020247   | 0.00396904  | 830     | 127      |
| 5   | 16740 | W   | 0.0121352   | 0.0104459  | 0.00191743  | 868     | 244      |
| 5   | 16740 | C   | 0.0184173   | 0.0111379  | 0.00237493  | 982     | 241      |
| 5   | 16787 | W   | 0.00999564  | 0.00903277 | 0.00114666  | 815     | 281      |
| 5   | 16787 | C   | 0.0130848   | 0.0097178  | 0.00207321  | 922     | 280      |
| 5   | 16829 | W   | 0.0711863   | 0.0622255  | 0.0126386   | 802     | 35       |
| 5   | 16829 | C   | 0.0479351   | 0.0577829  | 0.0121708   | 211     | 40       |
| 5   | 16853 | W   | 0.122868    | 0.0832939  | 0.0191864   | 965     | 25       |
| 5   | 16853 | C   | 0.0695057   | 0.0861159  | 0.0201013   | 187     | 25       |
| 5   | 16874 | W   | 0.070515    | 0.0739976  | 0.0161408   | 487     | 29       |
| 5   | 16874 | C   | 0.0662705   | 0.0739378  | 0.0158829   | 371     | 30       |
| 5   | 19825 | W   | 0.13216     | 0.146233   | 0.0362879   | 407     | 13       |
| 5   | 19825 | C   | 0.105358    | 0.0865355  | 0.0193606   | 869     | 25       |

Table 10: Results for gene classes taken from level 2 of the Gene Ontology heirarchy on chromosome 5 using TIGR data with the tandem duplications removed



| Chr | Class | Std | Orig. Grnwd | MC Grnwd   | SD MC grnwd | Ranking | Examples |
|-----|-------|-----|-------------|------------|-------------|---------|----------|
| 1   | 03677 | W   | 0.0112648   | 0.00743769 | 0.000775259 | 999     | 334      |
| 1   | 03677 | C   | 0.00877793  | 0.00811889 | 0.00123578  | 809     | 335      |
| 1   | 03723 | W   | 0.0432581   | 0.0414197  | 0.00742404  | 691     | 52       |
| 1   | 03723 | C   | 0.0344318   | 0.0384559  | 0.00749782  | 337     | 59       |
| 1   | 04888 | W   | 0.061648    | 0.0592349  | 0.010758    | 674     | 35       |
| 1   | 04888 | C   | 0.0671268   | 0.0771114  | 0.0159577   | 286     | 27       |
| 1   | 05516 | W   | 0.118875    | 0.142978   | 0.0359628   | 245     | 13       |
| 1   | 05516 | C   | 0.091567    | 0.0935347  | 0.0212433   | 546     | 22       |
| 1   | 08026 | W   | 0.191664    | 0.132707   | 0.0312037   | 937     | 14       |
| 1   | 08026 | C   | 0.0921932   | 0.100466   | 0.0222138   | 409     | 20       |
| 1   | 08135 | W   | 0.0651981   | 0.0733003  | 0.0151423   | 320     | 28       |
| 1   | 08135 | C   | 0.0775567   | 0.10067    | 0.0224354   | 92      | 20       |
| 1   | 08233 | W   | 0.0233759   | 0.0267963  | 0.00391656  | 178     | 83       |
| 1   | 08233 | C   | 0.0206304   | 0.0253335  | 0.00434446  | 70      | 93       |
| 1   | 08324 | W   | 0.0892873   | 0.0643345  | 0.0122961   | 957     | 32       |
| 1   | 08324 | C   | 0.0985978   | 0.0693797  | 0.0156099   | 955     | 31       |
| 1   | 08509 | W   | 0.122651    | 0.118825   | 0.0287947   | 649     | 16       |
| 1   | 08509 | C   | 0.251104    | 0.155078   | 0.0392027   | 974     | 12       |
| 1   | 15036 | W   | 0.0889079   | 0.0901678  | 0.0196119   | 564     | 22       |
| 1   | 15036 | C   | 0.109883    | 0.110495   | 0.0246957   | 575     | 18       |
| 1   | 15268 | W   | 0.160893    | 0.165289   | 0.0441906   | 555     | 11       |
| 1   | 15268 | C   | 0.169791    | 0.13006    | 0.0337903   | 888     | 15       |
| 1   | 15290 | W   | 0.0543088   | 0.0471399  | 0.00858893  | 863     | 45       |
| 1   | 15290 | C   | 0.0558487   | 0.0449885  | 0.00837621  | 913     | 49       |
| 1   | 15399 | W   | 0.071959    | 0.0500326  | 0.00921786  | 975     | 42       |
| 1   | 15399 | C   | 0.0715982   | 0.0730087  | 0.0156018   | 552     | 29       |
| 1   | 16614 | W   | 0.109443    | 0.0727909  | 0.0138139   | 981     | 28       |
| 1   | 16614 | C   | 0.0704166   | 0.0725814  | 0.0154577   | 525     | 29       |
| 1   | 16684 | W   | 0.101995    | 0.1429     | 0.0357926   | 46      | 13       |
| 1   | 16684 | C   | 0.239059    | 0.24122    | 0.0747899   | 618     | 7        |
| 1   | 16705 | W   | 0.084949    | 0.0972554  | 0.0203405   | 299     | 20       |
| 1   | 16705 | C   | 0.190129    | 0.145093   | 0.0353034   | 905     | 13       |
| 1   | 16741 | W   | 0.0598148   | 0.0900472  | 0.0191944   | 3       | 22       |
| 1   | 16741 | C   | 0.0751853   | 0.0883928  | 0.0193237   | 240     | 23       |
| 1   | 16746 | W   | 0.136794    | 0.107688   | 0.0236941   | 892     | 18       |
| 1   | 16746 | C   | 0.091873    | 0.0729661  | 0.0151366   | 901     | 29       |
| 1   | 16757 | W   | 0.0667384   | 0.0439505  | 0.00771198  | 981     | 49       |
| 1   | 16757 | C   | 0.0464788   | 0.0409976  | 0.00761115  | 811     | 54       |
| 1   | 16765 | W   | 0.107635    | 0.0975849  | 0.0212669   | 767     | 20       |
| 1   | 16765 | C   | 0.109202    | 0.129399   | 0.0330854   | 284     | 15       |
| 1   | 16772 | W   | 0.0199833   | 0.0143497  | 0.0020718   | 965     | 164      |
| 1   | 16772 | C   | 0.0222955   | 0.0169544  | 0.0026394   | 960     | 143      |
| 1   | 16788 | W   | 0.0373592   | 0.0252128  | 0.00383814  | 989     | 89       |
| 1   | 16788 | C   | 0.0220473   | 0.024448   | 0.00390301  | 272     | 96       |
| 1   | 16798 | W   | 0.0545562   | 0.051458   | 0.00898214  | 705     | 41       |
| 1   | 16798 | C   | 0.0345892   | 0.0385588  | 0.00729644  | 332     | 58       |
| 1   | 16817 | W   | 0.0340734   | 0.0316031  | 0.00527004  | 730     | 70       |
| 1   | 16817 | C   | 0.0434497   | 0.0301946  | 0.00521785  | 976     | 76       |
| 1   | 16830 | W   | 0.288981    | 0.2113     | 0.0572581   | 907     | 8        |
| 1   | 16830 | C   | 0.114107    | 0.121327   | 0.0291212   | 481     | 16       |
| 1   | 16835 | W   | 0.114373    | 0.119055   | 0.0280642   | 530     | 16       |
| 1   | 16835 | C   | 0.11854     | 0.106071   | 0.0268915   | 780     | 19       |
| 1   | 16879 | W   | 0.0965149   | 0.0946107  | 0.0201971   | 620     | 21       |
| 1   | 16879 | C   | 0.0932646   | 0.145352   | 0.037394    | 6       | 13       |
| 1   | 17076 | W   | 0.0114333   | 0.0102652  | 0.00112816  | 868     | 234      |
| 1   | 17076 | C   | 0.0131537   | 0.00902253 | 0.00102379  | 996     | 285      |
| 1   | 46872 | W   | 0.024028    | 0.0180166  | 0.00237599  | 978     | 127      |
| 1   | 46872 | C   | 0.0230331   | 0.0180724  | 0.00275136  | 952     | 133      |
| 1   | 46873 | W   | 0.182189    | 0.153105   | 0.0401475   | 829     | 12       |
| 1   | 46873 | C   | 0.113717    | 0.110653   | 0.0287141   | 638     | 18       |

Table 11: Results for gene classes taken from level 3 of the Gene Ontology heirarchy on chromosome 1 using TIGR data with the tandem duplications removed

| Chr | Class | Std | Orig. Grnwd | MC Grnwd  | SD MC grnwd | Ranking | Examples |
|-----|-------|-----|-------------|-----------|-------------|---------|----------|
| 2   | 03677 | W   | 0.0104227   | 0.0103567 | 0.00121916  | 617     | 236      |
| 2   | 03677 | C   | 0.0121405   | 0.0111161 | 0.0014223   | 815     | 218      |
| 2   | 03723 | W   | 0.0346826   | 0.0377351 | 0.00711278  | 388     | 60       |
| 2   | 03723 | C   | 0.0314191   | 0.0356429 | 0.00747756  | 298     | 64       |
| 2   | 04888 | W   | 0.186446    | 0.136962  | 0.0323555   | 923     | 14       |
| 2   | 04888 | C   | 0.189256    | 0.129371  | 0.0332084   | 949     | 15       |
| 2   | 05516 | W   | 0.174792    | 0.156617  | 0.0385985   | 738     | 12       |
| 2   | 05516 | C   | 0.173693    | 0.146776  | 0.0366692   | 800     | 13       |
| 2   | 08026 | W   | 0.13553     | 0.157857  | 0.0403405   | 327     | 12       |
| 2   | 08026 | C   | 0.313679    | 0.233308  | 0.0580832   | 907     | 7        |
| 2   | 08135 | W   | 0.155136    | 0.167164  | 0.0429292   | 452     | 11       |
| 2   | 08135 | C   | 0.138527    | 0.165157  | 0.0399058   | 286     | 11       |
| 2   | 08233 | W   | 0.0456441   | 0.0501534 | 0.0101662   | 387     | 44       |
| 2   | 08233 | C   | 0.0329689   | 0.0303633 | 0.00575822  | 761     | 77       |
| 2   | 08324 | W   | 0.0783946   | 0.0940081 | 0.0219553   | 240     | 22       |
| 2   | 08324 | C   | 0.142701    | 0.13091   | 0.0331694   | 728     | 15       |
| 2   | 08509 | W   | 0.222295    | 0.215237  | 0.0573555   | 652     | 8        |
| 2   | 08509 | C   | 0.258681    | 0.211388  | 0.0567755   | 842     | 8        |
| 2   | 15036 | W   | 0.538734    | 0.265629  | 0.0691196   | 995     | 6        |
| 2   | 15036 | C   | 0.182638    | 0.211328  | 0.0530256   | 336     | 8        |
| 2   | 15268 | W   | 0.121633    | 0.12867   | 0.0291115   | 478     | 15       |
| 2   | 15268 | C   | 0.274044    | 0.211519  | 0.054928    | 890     | 8        |
| 2   | 15290 | W   | 0.105731    | 0.0943084 | 0.0227199   | 758     | 22       |
| 2   | 15290 | C   | 0.0749605   | 0.0676848 | 0.0152143   | 752     | 32       |
| 2   | 15399 | W   | 0.110104    | 0.0870072 | 0.0192825   | 894     | 24       |
| 2   | 15399 | C   | 0.10166     | 0.0968783 | 0.0227527   | 672     | 21       |
| 2   | 16614 | W   | 0.145478    | 0.135955  | 0.031394    | 690     | 14       |
| 2   | 16614 | C   | 0.167532    | 0.145675  | 0.0346953   | 777     | 13       |
| 2   | 16684 | W   | 0.232707    | 0.21529   | 0.0546774   | 708     | 8        |
| 2   | 16684 | C   | 0.223316    | 0.196067  | 0.0473663   | 780     | 9        |
| 2   | 16705 | W   | 0.240199    | 0.237971  | 0.0627918   | 608     | 7        |
| 2   | 16705 | C   | 0.195492    | 0.166382  | 0.0439648   | 806     | 11       |
| 2   | 16741 | W   | 0.20979     | 0.196969  | 0.049474    | 685     | 9        |
| 2   | 16741 | C   | 0.160775    | 0.168885  | 0.043349    | 494     | 11       |
| 2   | 16746 | W   | 0.104523    | 0.130026  | 0.0325353   | 196     | 15       |
| 2   | 16746 | C   | 0.0890638   | 0.101596  | 0.0247075   | 363     | 20       |
| 2   | 16757 | W   | 0.0688639   | 0.0692211 | 0.0153597   | 598     | 31       |
| 2   | 16757 | C   | 0.114446    | 0.0736175 | 0.0176818   | 973     | 29       |
| 2   | 16765 | W   | 0.194296    | 0.156408  | 0.0404844   | 856     | 12       |
| 2   | 16765 | C   | 0.287522    | 0.233806  | 0.0585521   | 856     | 7        |
| 2   | 16772 | W   | 0.0176957   | 0.0202128 | 0.0032316   | 196     | 117      |
| 2   | 16772 | C   | 0.0166322   | 0.0190175 | 0.00289368  | 190     | 124      |
| 2   | 16788 | W   | 0.0323267   | 0.0327083 | 0.00606734  | 576     | 70       |
| 2   | 16788 | C   | 0.0282482   | 0.0312208 | 0.00577268  | 347     | 75       |
| 2   | 16798 | W   | 0.0909692   | 0.089414  | 0.0202567   | 627     | 23       |
| 2   | 16798 | C   | 0.136232    | 0.0777297 | 0.0177416   | 986     | 27       |
| 2   | 16817 | W   | 0.0403907   | 0.0417495 | 0.00835943  | 534     | 54       |
| 2   | 16817 | C   | 0.0561158   | 0.0573333 | 0.0135947   | 570     | 39       |
| 2   | 16830 | W   | 0.142254    | 0.195474  | 0.0489293   | 102     | 9        |
| 2   | 16830 | C   | 0.193914    | 0.180522  | 0.0444134   | 706     | 10       |
| 2   | 16835 | W   | 0.198481    | 0.145977  | 0.0347089   | 927     | 13       |
| 2   | 16835 | C   | 0.204152    | 0.147749  | 0.038601    | 923     | 13       |
| 2   | 16879 | W   | 0.203086    | 0.138168  | 0.0323754   | 958     | 14       |
| 2   | 16879 | C   | 0.104247    | 0.116908  | 0.0281578   | 390     | 17       |
| 2   | 17076 | W   | 0.0124449   | 0.0150802 | 0.00213807  | 42      | 159      |
| 2   | 17076 | C   | 0.0149238   | 0.0148545 | 0.00211246  | 597     | 160      |
| 2   | 46872 | W   | 0.0562068   | 0.0275346 | 0.00497476  | 999     | 84       |
| 2   | 46872 | C   | 0.0503996   | 0.031712  | 0.006277    | 982     | 73       |
| 2   | 46873 | W   | 0.20553     | 0.180018  | 0.0451437   | 768     | 10       |
| 2   | 46873 | C   | 0.239438    | 0.212352  | 0.0505511   | 749     | 8        |

Table 12: Results for gene classes taken from level 3 of the Gene Ontology heirarchy on chromosome 2 using TIGR data with the tandem duplications removed

| Chr | Class | Std | Orig. Grnwd | MC Grnwd  | SD MC grnwd | Ranking | Examples |
|-----|-------|-----|-------------|-----------|-------------|---------|----------|
| 3   | 03677 | W   | 0.0263911   | 0.012224  | 0.00165541  | 1000    | 237      |
| 3   | 03677 | C   | 0.0196053   | 0.0123025 | 0.00198502  | 996     | 241      |
| 3   | 03723 | W   | 0.0741158   | 0.0598415 | 0.0138504   | 862     | 38       |
| 3   | 03723 | C   | 0.101448    | 0.049219  | 0.011411    | 996     | 49       |
| 3   | 04888 | W   | 0.184884    | 0.142813  | 0.038696    | 874     | 14       |
| 3   | 04888 | C   | 0.1849      | 0.137107  | 0.0369359   | 905     | 15       |
| 3   | 05516 | W   | 0.100107    | 0.128727  | 0.0344158   | 164     | 16       |
| 3   | 05516 | C   | 0.210285    | 0.13761   | 0.0367163   | 955     | 15       |
| 3   | 08026 | W   | 0.293636    | 0.173373  | 0.0468613   | 973     | 11       |
| 3   | 08026 | C   | 0.187574    | 0.163889  | 0.0433285   | 779     | 12       |
| 3   | 08135 | W   | 0.281498    | 0.223907  | 0.0629609   | 842     | 8        |
| 3   | 08135 | C   | 0.198122    | 0.128622  | 0.0333265   | 952     | 16       |
| 3   | 08233 | W   | 0.0306077   | 0.0401489 | 0.00879667  | 65      | 60       |
| 3   | 08233 | C   | 0.0312083   | 0.0385205 | 0.00879191  | 173     | 67       |
| 3   | 08324 | W   | 0.130001    | 0.151095  | 0.0409121   | 351     | 13       |
| 3   | 08324 | C   | 0.0967897   | 0.0816011 | 0.0199545   | 833     | 28       |
| 3   | 08509 | W   | 0.189316    | 0.225047  | 0.0648768   | 335     | 8        |
| 3   | 08509 | C   | 0.129469    | 0.125406  | 0.035697    | 650     | 17       |
| 3   | 15036 | W   | 0.223256    | 0.203921  | 0.0590748   | 733     | 9        |
| 3   | 15036 | C   | 0.163199    | 0.152665  | 0.0408646   | 705     | 13       |
| 3   | 15268 | W   | 0.113042    | 0.151833  | 0.0421542   | 128     | 13       |
| 3   | 15268 | C   | 0.248785    | 0.225787  | 0.0671843   | 722     | 8        |
| 3   | 15290 | W   | 0.115692    | 0.102749  | 0.0275028   | 777     | 21       |
| 3   | 15290 | C   | 0.0955248   | 0.0692983 | 0.015565    | 930     | 34       |
| 3   | 15399 | W   | 0.134115    | 0.12135   | 0.0314217   | 736     | 17       |
| 3   | 15399 | C   | 0.109014    | 0.0662885 | 0.0157374   | 979     | 36       |
| 3   | 16614 | W   | 0.15114     | 0.0876905 | 0.0207863   | 984     | 25       |
| 3   | 16614 | C   | 0.102012    | 0.131898  | 0.0363948   | 200     | 16       |
| 3   | 16684 | W   | 0.135366    | 0.203612  | 0.0569976   | 43      | 9        |
| 3   | 16684 | C   | 0.290516    | 0.317298  | 0.0961902   | 499     | 5        |
| 3   | 16705 | W   | 0.29337     | 0.162105  | 0.0437922   | 981     | 12       |
| 3   | 16705 | C   | 0.27373     | 0.377635  | 0.113235    | 178     | 4        |
| 3   | 16741 | W   | 0.137989    | 0.144688  | 0.0398418   | 530     | 14       |
| 3   | 16741 | C   | 0.167095    | 0.136838  | 0.0371045   | 841     | 15       |
| 3   | 16746 | W   | 0.158679    | 0.121109  | 0.0312022   | 885     | 17       |
| 3   | 16746 | C   | 0.272176    | 0.176903  | 0.0477746   | 952     | 11       |
| 3   | 16757 | W   | 0.100481    | 0.0767234 | 0.0181756   | 904     | 29       |
| 3   | 16757 | C   | 0.0519794   | 0.0665585 | 0.0168971   | 137     | 35       |
| 3   | 16765 | W   | 0.201503    | 0.245143  | 0.0698818   | 302     | 7        |
| 3   | 16765 | C   | 0.164637    | 0.144875  | 0.0388722   | 761     | 14       |
| 3   | 16772 | W   | 0.0314673   | 0.0214768 | 0.00359096  | 984     | 121      |
| 3   | 16772 | C   | 0.0463411   | 0.0251376 | 0.00507941  | 993     | 106      |
| 3   | 16788 | W   | 0.0556525   | 0.0277779 | 0.00528946  | 998     | 89       |
| 3   | 16788 | C   | 0.0717801   | 0.0296899 | 0.0062334   | 1000    | 87       |
| 3   | 16798 | W   | 0.0887334   | 0.0665127 | 0.0155181   | 916     | 34       |
| 3   | 16798 | C   | 0.0746403   | 0.0575421 | 0.0128867   | 897     | 41       |
| 3   | 16817 | W   | 0.0523847   | 0.0458081 | 0.00969333  | 814     | 52       |
| 3   | 16817 | C   | 0.0585609   | 0.0418498 | 0.00961855  | 936     | 59       |
| 3   | 16830 | W   | 0.247403    | 0.162812  | 0.0459642   | 943     | 12       |
| 3   | 16830 | C   | 0.139028    | 0.148827  | 0.0423823   | 506     | 14       |
| 3   | 16835 | W   | 0.130277    | 0.106633  | 0.0282779   | 842     | 20       |
| 3   | 16835 | C   | 0.263629    | 0.138116  | 0.0370122   | 992     | 15       |
| 3   | 16879 | W   | 0.20492     | 0.143483  | 0.039062    | 929     | 14       |
| 3   | 16879 | C   | 0.107115    | 0.117466  | 0.030972    | 449     | 18       |
| 3   | 17076 | W   | 0.0160823   | 0.0133698 | 0.00166913  | 958     | 204      |
| 3   | 17076 | C   | 0.0184426   | 0.0145995 | 0.00258743  | 920     | 199      |
| 3   | 46872 | W   | 0.0282059   | 0.0264356 | 0.00475089  | 742     | 96       |
| 3   | 46872 | C   | 0.0331502   | 0.028703  | 0.00600743  | 816     | 92       |
| 3   | 46873 | W   | 0.280883    | 0.279438  | 0.0824004   | 613     | 6        |
| 3   | 46873 | C   | 0.164473    | 0.131526  | 0.0365733   | 855     | 16       |

Table 13: Results for gene classes taken from level 3 of the Gene Ontology heirarchy on chromosome 3 using TIGR data with the tandem duplications removed

| Chr | Class | Std | Orig. Grnwd | MC Grnwd  | SD MC grnwd | Ranking | Examples |
|-----|-------|-----|-------------|-----------|-------------|---------|----------|
| 4   | 03677 | W   | 0.0129923   | 0.0121034 | 0.00130761  | 815     | 192      |
| 4   | 03677 | C   | 0.0169025   | 0.0130652 | 0.00182494  | 960     | 188      |
| 4   | 03723 | W   | 0.0417018   | 0.047902  | 0.00884043  | 254     | 44       |
| 4   | 03723 | C   | 0.0540145   | 0.0599444 | 0.0128247   | 361     | 36       |
| 4   | 04888 | W   | 0.0644233   | 0.0888302 | 0.0184649   | 21      | 22       |
| 4   | 04888 | C   | 0.0836343   | 0.0965266 | 0.0221236   | 300     | 21       |
| 4   | 05516 | W   | 0.118923    | 0.149038  | 0.0320399   | 154     | 12       |
| 4   | 05516 | C   | 0.235037    | 0.178224  | 0.0437043   | 924     | 10       |
| 4   | 08026 | W   | 0.167338    | 0.191652  | 0.0510272   | 354     | 9        |
| 4   | 08026 | C   | 0.287412    | 0.255354  | 0.0655557   | 761     | 6        |
| 4   | 08135 | W   | 0.149115    | 0.161074  | 0.0389979   | 433     | 11       |
| 4   | 08135 | C   | 0.148636    | 0.157594  | 0.0372392   | 465     | 12       |
| 4   | 08233 | W   | 0.0285846   | 0.0324468 | 0.00490406  | 200     | 66       |
| 4   | 08233 | C   | 0.0462363   | 0.0425322 | 0.00769399  | 741     | 52       |
| 4   | 08324 | W   | 0.0989273   | 0.141374  | 0.0336064   | 25      | 13       |
| 4   | 08324 | C   | 0.150823    | 0.105121  | 0.0233651   | 948     | 19       |
| 4   | 08509 | W   | 0.179975    | 0.209712  | 0.0523687   | 328     | 8        |
| 4   | 08509 | C   | 0.324323    | 0.264871  | 0.0720354   | 837     | 6        |
| 4   | 15036 | W   | 0.181255    | 0.193223  | 0.052831    | 483     | 9        |
| 4   | 15036 | C   | 0.262949    | 0.212784  | 0.0547736   | 851     | 8        |
| 4   | 15268 | W   | 0.224898    | 0.150251  | 0.0353664   | 953     | 12       |
| 4   | 15268 | C   | 0.163498    | 0.142327  | 0.0325918   | 787     | 13       |
| 4   | 15290 | W   | 0.0952999   | 0.113607  | 0.0277873   | 263     | 17       |
| 4   | 15290 | C   | 0.111193    | 0.11119   | 0.0265576   | 586     | 18       |
| 4   | 15399 | W   | 0.121387    | 0.118155  | 0.0281176   | 647     | 16       |
| 4   | 15399 | C   | 0.100686    | 0.082736  | 0.0189495   | 863     | 25       |
| 4   | 16614 | W   | 0.0975486   | 0.132796  | 0.0320763   | 75      | 14       |
| 4   | 16614 | C   | 0.116744    | 0.096415  | 0.0206631   | 853     | 21       |
| 4   | 16684 | W   | 0.110852    | 0.139844  | 0.0329314   | 156     | 13       |
| 4   | 16684 | C   | 0.197149    | 0.177635  | 0.0449469   | 752     | 10       |
| 4   | 16705 | W   | 0.178822    | 0.205722  | 0.0504966   | 341     | 8        |
| 4   | 16705 | C   | 0.303436    | 0.293133  | 0.0760366   | 654     | 5        |
| 4   | 16741 | W   | 0.15553     | 0.140792  | 0.0347722   | 749     | 13       |
| 4   | 16741 | C   | 0.146812    | 0.135301  | 0.0315504   | 699     | 14       |
| 4   | 16746 | W   | 0.600006    | 0.175414  | 0.0410942   | 1000    | 10       |
| 4   | 16746 | C   | 0.185573    | 0.209597  | 0.0520227   | 370     | 8        |
| 4   | 16757 | W   | 0.0659497   | 0.0615748 | 0.0117633   | 736     | 33       |
| 4   | 16757 | C   | 0.0815639   | 0.0685936 | 0.0149952   | 841     | 31       |
| 4   | 16765 | W   | 0.225286    | 0.207875  | 0.0504392   | 725     | 8        |
| 4   | 16765 | C   | 0.248316    | 0.208959  | 0.0514157   | 833     | 8        |
| 4   | 16772 | W   | 0.0270851   | 0.0234177 | 0.00327129  | 892     | 94       |
| 4   | 16772 | C   | 0.0235973   | 0.0271343 | 0.0046604   | 205     | 85       |
| 4   | 16788 | W   | 0.0459036   | 0.0499351 | 0.00902391  | 378     | 42       |
| 4   | 16788 | C   | 0.0611591   | 0.0349187 | 0.00629433  | 996     | 66       |
| 4   | 16798 | W   | 0.0842368   | 0.0932126 | 0.0213874   | 400     | 21       |
| 4   | 16798 | C   | 0.0635588   | 0.0585905 | 0.0117683   | 752     | 37       |
| 4   | 16817 | W   | 0.0564313   | 0.045103  | 0.00773016  | 925     | 46       |
| 4   | 16817 | C   | 0.0596262   | 0.0560577 | 0.011947    | 700     | 39       |
| 4   | 16830 | W   | 0.289936    | 0.290194  | 0.0766889   | 583     | 5        |
| 4   | 16830 | C   | 0.309101    | 0.23276   | 0.0586496   | 906     | 7        |
| 4   | 16835 | W   | 0.168894    | 0.209922  | 0.0530881   | 220     | 8        |
| 4   | 16835 | C   | 0.160676    | 0.109992  | 0.0250202   | 957     | 18       |
| 4   | 16879 | W   | 0.158204    | 0.14082   | 0.0336505   | 761     | 13       |
| 4   | 16879 | C   | 0.213312    | 0.128431  | 0.0304347   | 982     | 15       |
| 4   | 17076 | W   | 0.0171887   | 0.0155604 | 0.00191376  | 843     | 146      |
| 4   | 17076 | C   | 0.0156878   | 0.0171109 | 0.0026329   | 312     | 140      |
| 4   | 46872 | W   | 0.0291204   | 0.0293612 | 0.00445817  | 573     | 73       |
| 4   | 46872 | C   | 0.0268637   | 0.0300383 | 0.00534075  | 307     | 76       |
| 4   | 46873 | W   | 0.159174    | 0.208489  | 0.0552013   | 136     | 8        |
| 4   | 46873 | C   | 0.138872    | 0.156184  | 0.0391834   | 387     | 12       |

Table 14: Results for gene classes taken from level 3 of the Gene Ontology heirarchy on chromosome 4 using TIGR data with the tandem duplications removed

| Chr | Class | Std | Orig. Grnwd | MC Grnwd   | SD MC grnwd | Ranking | Examples |
|-----|-------|-----|-------------|------------|-------------|---------|----------|
| 5   | 03677 | W   | 0.01122     | 0.00813623 | 0.00155813  | 959     | 322      |
| 5   | 03677 | C   | 0.00895194  | 0.0086028  | 0.00193718  | 762     | 321      |
| 5   | 03723 | W   | 0.0517797   | 0.0422362  | 0.00833106  | 873     | 54       |
| 5   | 03723 | C   | 0.0431566   | 0.0465661  | 0.00977175  | 447     | 51       |
| 5   | 04888 | W   | 0.0603689   | 0.0591141  | 0.0122314   | 617     | 37       |
| 5   | 04888 | C   | 0.139476    | 0.0932902  | 0.0225263   | 965     | 23       |
| 5   | 05516 | W   | 0.122023    | 0.122446   | 0.0302002   | 586     | 16       |
| 5   | 05516 | C   | 0.208923    | 0.103458   | 0.022912    | 999     | 20       |
| 5   | 08026 | W   | 0.169112    | 0.131586   | 0.0336958   | 880     | 15       |
| 5   | 08026 | C   | 0.115781    | 0.14224    | 0.0376127   | 238     | 14       |
| 5   | 08135 | W   | 0.111221    | 0.100929   | 0.023443    | 743     | 20       |
| 5   | 08135 | C   | 0.0835833   | 0.100647   | 0.0245403   | 242     | 21       |
| 5   | 08233 | W   | 0.0240237   | 0.0278832  | 0.0053231   | 231     | 85       |
| 5   | 08233 | C   | 0.0345186   | 0.0346533  | 0.00784115  | 613     | 71       |
| 5   | 08324 | W   | 0.112969    | 0.118477   | 0.0314447   | 523     | 17       |
| 5   | 08324 | C   | 0.106023    | 0.069281   | 0.0155078   | 965     | 32       |
| 5   | 08509 | W   | 0.140147    | 0.170098   | 0.0456754   | 255     | 11       |
| 5   | 08509 | C   | 0.218768    | 0.151233   | 0.0424222   | 922     | 13       |
| 5   | 15036 | W   | 0.197224    | 0.199226   | 0.0533452   | 578     | 9        |
| 5   | 15036 | C   | 0.137191    | 0.115361   | 0.0277765   | 817     | 18       |
| 5   | 15268 | W   | 0.109074    | 0.15834    | 0.0413776   | 41      | 12       |
| 5   | 15268 | C   | 0.0868651   | 0.08578    | 0.0189725   | 595     | 25       |
| 5   | 15290 | W   | 0.0407779   | 0.0485806  | 0.00972985  | 198     | 46       |
| 5   | 15290 | C   | 0.0580766   | 0.0588008  | 0.0131948   | 575     | 39       |
| 5   | 15399 | W   | 0.0886392   | 0.0846687  | 0.0196059   | 673     | 25       |
| 5   | 15399 | C   | 0.102243    | 0.0626415  | 0.0138766   | 981     | 36       |
| 5   | 16614 | W   | 0.0600013   | 0.0739093  | 0.0166394   | 167     | 29       |
| 5   | 16614 | C   | 0.0748891   | 0.0887599  | 0.0202041   | 256     | 24       |
| 5   | 16684 | W   | 0.263056    | 0.307539   | 0.0866888   | 364     | 5        |
| 5   | 16684 | C   | 0.131215    | 0.14284    | 0.0380675   | 459     | 14       |
| 5   | 16705 | W   | 0.260239    | 0.156134   | 0.0396956   | 973     | 12       |
| 5   | 16705 | C   | 0.167615    | 0.149306   | 0.0365214   | 745     | 13       |
| 5   | 16741 | W   | 0.0936445   | 0.0818252  | 0.0199275   | 817     | 26       |
| 5   | 16741 | C   | 0.11064     | 0.120955   | 0.0300102   | 447     | 17       |
| 5   | 16746 | W   | 0.171211    | 0.12504    | 0.0331477   | 908     | 16       |
| 5   | 16746 | C   | 0.206059    | 0.121051   | 0.0320166   | 979     | 17       |
| 5   | 16757 | W   | 0.0543074   | 0.0594586  | 0.012272    | 382     | 37       |
| 5   | 16757 | C   | 0.100092    | 0.0616616  | 0.0134518   | 988     | 37       |
| 5   | 16765 | W   | 0.152023    | 0.181115   | 0.0522266   | 327     | 10       |
| 5   | 16765 | C   | 0.161363    | 0.140091   | 0.0361292   | 795     | 14       |
| 5   | 16772 | W   | 0.0214387   | 0.0182991  | 0.00314096  | 864     | 133      |
| 5   | 16772 | C   | 0.0235594   | 0.0195708  | 0.00407872  | 880     | 132      |
| 5   | 16788 | W   | 0.0277638   | 0.0287146  | 0.00545909  | 525     | 82       |
| 5   | 16788 | C   | 0.0290335   | 0.0287027  | 0.00615458  | 633     | 87       |
| 5   | 16798 | W   | 0.0906331   | 0.0611611  | 0.0133093   | 961     | 36       |
| 5   | 16798 | C   | 0.0457761   | 0.0539012  | 0.0126032   | 276     | 43       |
| 5   | 16817 | W   | 0.0605538   | 0.0351744  | 0.00695328  | 994     | 66       |
| 5   | 16817 | C   | 0.041682    | 0.0314016  | 0.00678317  | 909     | 79       |
| 5   | 16830 | W   | 0.170408    | 0.155443   | 0.0402545   | 746     | 12       |
| 5   | 16830 | C   | 0.156601    | 0.119835   | 0.0285022   | 901     | 17       |
| 5   | 16835 | W   | 0.145995    | 0.138652   | 0.0374562   | 687     | 14       |
| 5   | 16835 | C   | 0.14122     | 0.161296   | 0.0455584   | 389     | 12       |
| 5   | 16879 | W   | 0.245606    | 0.171062   | 0.0489063   | 920     | 11       |
| 5   | 16879 | C   | 0.0937029   | 0.113763   | 0.0281602   | 237     | 18       |
| 5   | 17076 | W   | 0.0174472   | 0.0104488  | 0.00191839  | 987     | 244      |
| 5   | 17076 | C   | 0.0161141   | 0.0111795  | 0.0015269   | 1000    | 257      |
| 5   | 46872 | W   | 0.0211967   | 0.0168163  | 0.00295392  | 927     | 146      |
| 5   | 46872 | C   | 0.0202159   | 0.0216254  | 0.00435813  | 432     | 118      |
| 5   | 46873 | W   | 0.140386    | 0.170474   | 0.0453658   | 272     | 11       |
| 5   | 46873 | C   | 0.16261     | 0.131026   | 0.0320155   | 870     | 15       |

Table 15: Results for gene classes taken from level 3 of the Gene Ontology heirarchy on chromosome 5 using TIGR data with the tandem duplications removed

| Chr | Class | Std | Orig. Grnwd | MC Grnwd   | SD MC grnwd | Ranking | Examples |
|-----|-------|-----|-------------|------------|-------------|---------|----------|
| 1   | 04175 | W   | 0.0513475   | 0.0562593  | 0.00995227  | 345     | 37       |
| 1   | 04175 | W   | 0.0513475   | 0.0563434  | 0.0101552   | 350     | 37       |
| 1   | 04175 | C   | 0.0449739   | 0.0478894  | 0.00929813  | 444     | 46       |
| 1   | 04175 | W   | 0.0513475   | 0.05688    | 0.0106956   | 340     | 37       |
| 1   | 04175 | W   | 0.0513475   | 0.0557699  | 0.00967406  | 361     | 37       |
| 1   | 04175 | C   | 0.0449739   | 0.0475833  | 0.00890772  | 445     | 46       |
| 1   | 04518 | W   | 0.109605    | 0.0745582  | 0.014036    | 972     | 27       |
| 1   | 04518 | C   | 0.0995586   | 0.0883178  | 0.0189466   | 783     | 23       |
| 1   | 04553 | W   | 0.0557008   | 0.0538762  | 0.00932359  | 648     | 39       |
| 1   | 04553 | C   | 0.0374352   | 0.0410777  | 0.00773694  | 355     | 54       |
| 1   | 04930 | W   | 0.108466    | 0.0990071  | 0.0226273   | 747     | 20       |
| 1   | 04930 | C   | 0.0739106   | 0.0846932  | 0.0180843   | 310     | 24       |
| 1   | 05216 | W   | 0.304123    | 0.212347   | 0.0604464   | 920     | 8        |
| 1   | 05216 | C   | 0.19828     | 0.156097   | 0.0403301   | 877     | 12       |
| 1   | 05351 | W   | 0.15101     | 0.16419    | 0.042401    | 452     | 11       |
| 1   | 05351 | C   | 0.232256    | 0.103538   | 0.0229448   | 999     | 19       |
| 1   | 05509 | W   | 0.0679089   | 0.060738   | 0.0110737   | 791     | 34       |
| 1   | 05509 | C   | 0.125761    | 0.0705349  | 0.0142229   | 994     | 30       |
| 1   | 08168 | W   | 0.0598148   | 0.0902619  | 0.0196243   | 1       | 22       |
| 1   | 08168 | C   | 0.0757883   | 0.0931364  | 0.020261    | 166     | 22       |
| 1   | 08234 | W   | 0.140658    | 0.118072   | 0.0264722   | 838     | 16       |
| 1   | 08234 | C   | 0.0641682   | 0.0727113  | 0.0149595   | 307     | 29       |
| 1   | 08236 | W   | 0.141556    | 0.0963499  | 0.0194063   | 971     | 20       |
| 1   | 08236 | C   | 0.0781281   | 0.0852379  | 0.0184905   | 413     | 24       |
| 1   | 08237 | W   | 0.0953594   | 0.120607   | 0.0299271   | 151     | 16       |
| 1   | 08237 | C   | 0.118285    | 0.0995007  | 0.0212722   | 839     | 20       |
| 1   | 08238 | W   | 0.142008    | 0.134512   | 0.0342668   | 680     | 14       |
| 1   | 08238 | C   | 0.136302    | 0.144898   | 0.0382489   | 508     | 13       |
| 1   | 15077 | W   | 0.182286    | 0.152211   | 0.0353606   | 838     | 12       |
| 1   | 15077 | C   | 0.126123    | 0.128138   | 0.0306994   | 572     | 15       |
| 1   | 15291 | W   | 0.0543088   | 0.0471359  | 0.00802181  | 844     | 45       |
| 1   | 15291 | C   | 0.0558487   | 0.0453071  | 0.00905796  | 903     | 49       |
| 1   | 15405 | W   | 0.09005     | 0.0586559  | 0.0111785   | 983     | 36       |
| 1   | 15405 | C   | 0.0855052   | 0.083012   | 0.0174757   | 624     | 25       |
| 1   | 16301 | W   | 0.0241956   | 0.0144615  | 0.00181786  | 999     | 162      |
| 1   | 16301 | C   | 0.0261603   | 0.0159654  | 0.00235532  | 998     | 153      |
| 1   | 16616 | W   | 0.109443    | 0.0724273  | 0.0135826   | 985     | 28       |
| 1   | 16616 | C   | 0.0929066   | 0.0859     | 0.0191422   | 742     | 24       |
| 1   | 16747 | W   | 0.141099    | 0.117739   | 0.027828    | 846     | 16       |
| 1   | 16747 | C   | 0.0925472   | 0.0768066  | 0.0153089   | 850     | 27       |
| 1   | 16758 | W   | 0.105398    | 0.0868072  | 0.0190894   | 867     | 23       |
| 1   | 16758 | C   | 0.0805193   | 0.0593405  | 0.0119754   | 949     | 36       |
| 1   | 16773 | W   | 0.0265585   | 0.0175763  | 0.00232149  | 995     | 130      |
| 1   | 16773 | C   | 0.0307395   | 0.021999   | 0.00375021  | 970     | 108      |
| 1   | 16779 | W   | 0.101478    | 0.0779168  | 0.0152251   | 923     | 26       |
| 1   | 16779 | C   | 0.0827133   | 0.0792753  | 0.0169494   | 670     | 26       |
| 1   | 16789 | W   | 0.116849    | 0.0808929  | 0.0164428   | 961     | 25       |
| 1   | 16789 | C   | 0.0929107   | 0.0799874  | 0.017765    | 825     | 26       |
| 1   | 16818 | W   | 0.0420057   | 0.0443335  | 0.0074675   | 439     | 49       |
| 1   | 16818 | C   | 0.0471878   | 0.0373437  | 0.00644888  | 923     | 60       |
| 1   | 16820 | W   | 0.1189      | 0.0783641  | 0.0149581   | 982     | 26       |
| 1   | 16820 | C   | 0.120898    | 0.110661   | 0.0271952   | 732     | 18       |
| 1   | 16836 | W   | 0.126712    | 0.153157   | 0.0407151   | 258     | 12       |
| 1   | 16836 | C   | 0.214194    | 0.155979   | 0.0428392   | 910     | 12       |
| 1   | 16881 | W   | 0.138938    | 0.143282   | 0.037581    | 550     | 13       |
| 1   | 16881 | C   | 0.283063    | 0.216109   | 0.0593664   | 877     | 8        |
| 1   | 19001 | W   | 0.0758917   | 0.0769395  | 0.0155041   | 546     | 26       |
| 1   | 19001 | C   | 0.0801111   | 0.0646556  | 0.0134908   | 882     | 33       |
| 1   | 30554 | W   | 0.0116206   | 0.0106348  | 0.00124603  | 823     | 225      |
| 1   | 30554 | C   | 0.0131895   | 0.00942394 | 0.00107213  | 994     | 275      |
| 1   | 42578 | W   | 0.0626789   | 0.0600429  | 0.011554    | 665     | 35       |
| 1   | 42578 | C   | 0.0492096   | 0.0595325  | 0.0117279   | 177     | 36       |
| 1   | 46914 | W   | 0.0335562   | 0.0258415  | 0.00373338  | 962     | 86       |
| 1   | 46914 | C   | 0.0269117   | 0.0240134  | 0.00383419  | 808     | 97       |

Table 16: Results for gene classes taken from level 4 of the Gene Ontology heirarchy on chromosome 1 using TIGR data with the tandem duplications removed

| Chr | Class | Std | Orig. Grnwd | MC Grnwd  | SD MC grnwd | Ranking | Examples |
|-----|-------|-----|-------------|-----------|-------------|---------|----------|
| 2   | 04175 | W   | 0.130923    | 0.158283  | 0.0391246   | 266     | 12       |
| 2   | 04175 | C   | 0.0633672   | 0.0832933 | 0.0176976   | 83      | 25       |
| 2   | 04518 | W   | 0.0632686   | 0.067484  | 0.0147448   | 462     | 32       |
| 2   | 04518 | C   | 0.0995639   | 0.0788869 | 0.0182116   | 888     | 27       |
| 2   | 04553 | W   | 0.10141     | 0.0959823 | 0.0237089   | 696     | 22       |
| 2   | 04553 | C   | 0.137122    | 0.0846905 | 0.0209282   | 970     | 25       |
| 2   | 04930 | W   | 0.216652    | 0.166296  | 0.0408891   | 900     | 11       |
| 2   | 04930 | C   | 0.232543    | 0.16621   | 0.0395209   | 933     | 11       |
| 2   | 05216 | W   | 0.184078    | 0.19591   | 0.0494723   | 479     | 9        |
| 2   | 05216 | C   | 0.386627    | 0.294625  | 0.0770053   | 894     | 5        |
| 2   | 05351 | W   | 0.248186    | 0.266352  | 0.0700611   | 475     | 6        |
| 2   | 05351 | C   | 0.119458    | 0.166081  | 0.0400158   | 69      | 11       |
| 2   | 05509 | W   | 0.130467    | 0.109584  | 0.0269941   | 826     | 19       |
| 2   | 05509 | C   | 0.114574    | 0.118733  | 0.0302282   | 539     | 17       |
| 2   | 08168 | W   | 0.20979     | 0.19595   | 0.0497701   | 677     | 9        |
| 2   | 08168 | C   | 0.160775    | 0.16835   | 0.0429306   | 515     | 11       |
| 2   | 08234 | W   | 0.458523    | 0.169967  | 0.0407021   | 999     | 11       |
| 2   | 08234 | C   | 0.0655755   | 0.0729867 | 0.0155429   | 378     | 29       |
| 2   | 08236 | W   | 0.189919    | 0.193229  | 0.0483657   | 564     | 9        |
| 2   | 08236 | C   | 0.137261    | 0.147925  | 0.0382315   | 479     | 13       |
| 2   | 08237 | W   | 0.12911     | 0.123147  | 0.0295054   | 664     | 16       |
| 2   | 08237 | C   | 0.106069    | 0.129361  | 0.0302272   | 232     | 15       |
| 2   | 08238 | W   | 0.364146    | 0.235382  | 0.0625365   | 961     | 7        |
| 2   | 08238 | C   | 0.118795    | 0.154172  | 0.036845    | 130     | 12       |
| 2   | 15077 | W   | 0.135514    | 0.158841  | 0.0405254   | 312     | 12       |
| 2   | 15077 | C   | 0.181782    | 0.261148  | 0.0669092   | 49      | 6        |
| 2   | 15291 | W   | 0.105731    | 0.0940487 | 0.023445    | 782     | 22       |
| 2   | 15291 | C   | 0.0749605   | 0.0681076 | 0.015131    | 741     | 32       |
| 2   | 15405 | W   | 0.117556    | 0.0970187 | 0.0221987   | 848     | 21       |
| 2   | 15405 | C   | 0.142166    | 0.107537  | 0.0254887   | 891     | 19       |
| 2   | 16301 | W   | 0.0291628   | 0.0267498 | 0.00448018  | 788     | 86       |
| 2   | 16301 | C   | 0.0467824   | 0.0233949 | 0.00390525  | 999     | 100      |
| 2   | 16616 | W   | 0.201552    | 0.146344  | 0.0353168   | 924     | 13       |
| 2   | 16616 | C   | 0.172182    | 0.167402  | 0.0409736   | 642     | 11       |
| 2   | 16747 | W   | 0.109136    | 0.137495  | 0.0312844   | 180     | 14       |
| 2   | 16747 | C   | 0.0926203   | 0.106723  | 0.0251298   | 331     | 19       |
| 2   | 16758 | W   | 0.0754195   | 0.0836011 | 0.0192207   | 397     | 25       |
| 2   | 16758 | C   | 0.179883    | 0.131982  | 0.0333749   | 907     | 15       |
| 2   | 16773 | W   | 0.0354505   | 0.03743   | 0.00784033  | 504     | 61       |
| 2   | 16773 | C   | 0.0654902   | 0.029929  | 0.00546081  | 1000    | 77       |
| 2   | 16779 | W   | 0.0429206   | 0.052901  | 0.0114393   | 154     | 42       |
| 2   | 16779 | C   | 0.052084    | 0.0485073 | 0.00992722  | 735     | 46       |
| 2   | 16789 | W   | 0.13646     | 0.0970424 | 0.0217254   | 930     | 21       |
| 2   | 16789 | C   | 0.188477    | 0.155326  | 0.0396634   | 842     | 12       |
| 2   | 16818 | W   | 0.0517624   | 0.0526443 | 0.0107515   | 564     | 42       |
| 2   | 16818 | C   | 0.0827753   | 0.0713228 | 0.0161384   | 821     | 30       |
| 2   | 16820 | W   | 0.139369    | 0.125466  | 0.0288928   | 735     | 16       |
| 2   | 16820 | C   | 0.217831    | 0.167474  | 0.040854    | 891     | 11       |
| 2   | 16836 | W   | 0.206834    | 0.165491  | 0.0399289   | 864     | 11       |
| 2   | 16836 | C   | 0.20676     | 0.179301  | 0.0425763   | 781     | 10       |
| 2   | 16881 | W   | 0.264655    | 0.183735  | 0.047894    | 942     | 10       |
| 2   | 16881 | C   | 0.243628    | 0.179358  | 0.0422828   | 931     | 10       |
| 2   | 19001 | W   | 0.119487    | 0.132036  | 0.0327903   | 414     | 15       |
| 2   | 19001 | C   | 0.11199     | 0.111385  | 0.0266912   | 621     | 18       |
| 2   | 30554 | W   | 0.0125171   | 0.0153304 | 0.00214348  | 46      | 156      |
| 2   | 30554 | C   | 0.0166748   | 0.015771  | 0.00235116  | 726     | 151      |
| 2   | 42578 | W   | 0.166253    | 0.12504   | 0.0299752   | 903     | 16       |
| 2   | 42578 | C   | 0.144693    | 0.0767527 | 0.018392    | 989     | 28       |
| 2   | 46914 | W   | 0.0598407   | 0.0366249 | 0.00757244  | 982     | 62       |
| 2   | 46914 | C   | 0.073084    | 0.0421166 | 0.00823319  | 991     | 53       |

Table 17: Results for gene classes taken from level 4 of the Gene Ontology heirarchy on chromosome 2 using TIGR data with the tandem duplications removed

| Chr | Class | Std | Orig. Grnwd | MC Grnwd  | SD MC grnwd | Ranking | Examples |
|-----|-------|-----|-------------|-----------|-------------|---------|----------|
| 3   | 04175 | W   | 0.0828367   | 0.0961691 | 0.0232794   | 330     | 22       |
| 3   | 04175 | C   | 0.0582969   | 0.0765958 | 0.0172947   | 92      | 30       |
| 3   | 04518 | W   | 0.0949133   | 0.0869089 | 0.0207863   | 740     | 25       |
| 3   | 04518 | C   | 0.181452    | 0.15358   | 0.0414696   | 800     | 13       |
| 3   | 04553 | W   | 0.0921558   | 0.0673205 | 0.0149732   | 936     | 33       |
| 3   | 04553 | C   | 0.0837389   | 0.0658764 | 0.0161823   | 872     | 36       |
| 3   | 04930 | W   | 0.184884    | 0.141904  | 0.0363811   | 886     | 14       |
| 3   | 04930 | C   | 0.205915    | 0.155036  | 0.0419373   | 894     | 13       |
| 3   | 05216 | W   | 0.154022    | 0.205372  | 0.0581426   | 158     | 9        |
| 3   | 05216 | C   | 0.482657    | 0.322519  | 0.098263    | 925     | 5        |
| 3   | 05351 | W   | 0.278424    | 0.246291  | 0.0697688   | 740     | 7        |
| 3   | 05351 | C   | 0.255614    | 0.164705  | 0.0466587   | 945     | 12       |
| 3   | 05509 | W   | 0.0729502   | 0.0832001 | 0.0195152   | 341     | 26       |
| 3   | 05509 | C   | 0.0812411   | 0.090279  | 0.0237967   | 430     | 25       |
| 3   | 08168 | W   | 0.137989    | 0.142825  | 0.0374344   | 559     | 14       |
| 3   | 08168 | C   | 0.167222    | 0.145615  | 0.039742    | 779     | 14       |
| 3   | 08234 | W   | 0.0722828   | 0.110967  | 0.0300086   | 12      | 19       |
| 3   | 08234 | C   | 0.108186    | 0.117789  | 0.0295892   | 449     | 18       |
| 3   | 08236 | W   | 0.147753    | 0.141818  | 0.0379138   | 663     | 14       |
| 3   | 08236 | C   | 0.195742    | 0.145048  | 0.0383188   | 908     | 14       |
| 3   | 08237 | W   | 0.179706    | 0.161171  | 0.0455517   | 746     | 12       |
| 3   | 08237 | C   | 0.228625    | 0.176214  | 0.0493472   | 868     | 11       |
| 3   | 08238 | W   | 0.177507    | 0.162559  | 0.047588    | 718     | 12       |
| 3   | 08238 | C   | 0.279828    | 0.146712  | 0.0420409   | 987     | 14       |
| 3   | 15077 | W   | 0.25912     | 0.247725  | 0.0680434   | 654     | 7        |
| 3   | 15077 | C   | 0.230877    | 0.207613  | 0.0585072   | 731     | 9        |
| 3   | 15291 | W   | 0.115692    | 0.101581  | 0.0278023   | 783     | 21       |
| 3   | 15291 | C   | 0.0955248   | 0.0690029 | 0.0164043   | 925     | 34       |
| 3   | 15405 | W   | 0.135881    | 0.135328  | 0.0379315   | 624     | 15       |
| 3   | 15405 | C   | 0.112491    | 0.0720566 | 0.0182815   | 966     | 33       |
| 3   | 16301 | W   | 0.0434729   | 0.0212459 | 0.00384822  | 999     | 124      |
| 3   | 16301 | C   | 0.0424516   | 0.0230334 | 0.00454562  | 994     | 117      |
| 3   | 16616 | W   | 0.155618    | 0.110908  | 0.0281267   | 920     | 19       |
| 3   | 16616 | C   | 0.107058    | 0.138254  | 0.0370709   | 180     | 15       |
| 3   | 16747 | W   | 0.162427    | 0.12691   | 0.0294896   | 887     | 16       |
| 3   | 16747 | C   | 0.290047    | 0.208166  | 0.0595817   | 912     | 9        |
| 3   | 16758 | W   | 0.157957    | 0.115376  | 0.0294689   | 912     | 18       |
| 3   | 16758 | C   | 0.0819283   | 0.0999651 | 0.0257017   | 264     | 22       |
| 3   | 16773 | W   | 0.0449781   | 0.0257899 | 0.00488935  | 997     | 98       |
| 3   | 16773 | C   | 0.048904    | 0.0325901 | 0.00706568  | 967     | 80       |
| 3   | 16779 | W   | 0.147724    | 0.121613  | 0.0309004   | 847     | 17       |
| 3   | 16779 | C   | 0.135605    | 0.130562  | 0.0337814   | 637     | 16       |
| 3   | 16789 | W   | 0.0941813   | 0.0721643 | 0.0170446   | 914     | 31       |
| 3   | 16789 | C   | 0.120314    | 0.0892498 | 0.0219505   | 911     | 25       |
| 3   | 16818 | W   | 0.0641669   | 0.0622456 | 0.0145049   | 658     | 36       |
| 3   | 16818 | C   | 0.0628488   | 0.0493296 | 0.0112963   | 884     | 50       |
| 3   | 16820 | W   | 0.226331    | 0.204136  | 0.0557434   | 735     | 9        |
| 3   | 16820 | C   | 0.133456    | 0.0896865 | 0.0219195   | 964     | 25       |
| 3   | 16836 | W   | 0.194999    | 0.150641  | 0.0417673   | 864     | 13       |
| 3   | 16836 | C   | 0.484423    | 0.229455  | 0.0672273   | 990     | 8        |
| 3   | 16881 | W   | 0.207774    | 0.186377  | 0.0529435   | 730     | 10       |
| 3   | 16881 | C   | 0.166702    | 0.165997  | 0.0460357   | 610     | 12       |
| 3   | 19001 | W   | 0.197903    | 0.131932  | 0.0325161   | 954     | 15       |
| 3   | 19001 | C   | 0.192229    | 0.110521  | 0.0294331   | 981     | 20       |
| 3   | 30554 | W   | 0.0162237   | 0.0141116 | 0.00208803  | 880     | 198      |
| 3   | 30554 | C   | 0.0185255   | 0.0151088 | 0.0027518   | 898     | 191      |
| 3   | 42578 | W   | 0.109951    | 0.0567932 | 0.0124646   | 997     | 40       |
| 3   | 42578 | C   | 0.0882181   | 0.0592558 | 0.0142728   | 955     | 40       |
| 3   | 46914 | W   | 0.0405973   | 0.0352331 | 0.00700902  | 828     | 69       |
| 3   | 46914 | C   | 0.0577903   | 0.0420076 | 0.00890319  | 943     | 60       |

Table 18: Results for gene classes taken from level 4 of the Gene Ontology heirarchy on chromosome 3 using TIGR data with the tandem duplications removed



| Chr | Class | Std | Orig. Grnwd | MC Grnwd  | SD MC grnwd | Ranking | Examples |
|-----|-------|-----|-------------|-----------|-------------|---------|----------|
| 4   | 04175 | W   | 0.0809505   | 0.0859348 | 0.0179553   | 472     | 23       |
| 4   | 04175 | C   | 0.0903446   | 0.116667  | 0.0293574   | 127     | 17       |
| 4   | 04518 | W   | 0.130448    | 0.163497  | 0.0415675   | 187     | 11       |
| 4   | 04518 | C   | 0.14075     | 0.154779  | 0.0353639   | 394     | 12       |
| 4   | 04553 | W   | 0.0978304   | 0.0976322 | 0.024293    | 628     | 20       |
| 4   | 04553 | C   | 0.0641654   | 0.0596606 | 0.0117898   | 730     | 36       |
| 4   | 04930 | W   | 0.0852606   | 0.132234  | 0.0334619   | 7       | 14       |
| 4   | 04930 | C   | 0.114211    | 0.163782  | 0.0407241   | 34      | 11       |
| 4   | 05216 | W   | 0.282537    | 0.210099  | 0.0537041   | 908     | 8        |
| 4   | 05216 | C   | 0.378377    | 0.194926  | 0.0498971   | 992     | 9        |
| 4   | 05351 | W   | 0.185814    | 0.258021  | 0.0673413   | 75      | 6        |
| 4   | 05351 | C   | 0.193436    | 0.235765  | 0.0626581   | 248     | 7        |
| 4   | 05509 | W   | 0.0643465   | 0.105155  | 0.0235894   | 0       | 18       |
| 4   | 05509 | C   | 0.110167    | 0.10543   | 0.0250035   | 689     | 19       |
| 4   | 08168 | W   | 0.15553     | 0.142188  | 0.0357029   | 742     | 13       |
| 4   | 08168 | C   | 0.146812    | 0.135734  | 0.0302899   | 693     | 14       |
| 4   | 08234 | W   | 0.0870523   | 0.101719  | 0.0214013   | 264     | 19       |
| 4   | 08234 | C   | 0.0955579   | 0.0905114 | 0.0200065   | 686     | 23       |
| 4   | 08236 | W   | 0.175203    | 0.162106  | 0.0395191   | 708     | 11       |
| 4   | 08236 | C   | 0.156771    | 0.137068  | 0.0334364   | 775     | 14       |
| 4   | 08237 | W   | 0.0932976   | 0.100795  | 0.0224498   | 439     | 19       |
| 4   | 08237 | C   | 0.176593    | 0.259332  | 0.0670985   | 32      | 6        |
| 4   | 08238 | W   | 0.124098    | 0.111082  | 0.0252676   | 769     | 17       |
| 4   | 08238 | C   | 0.271337    | 0.233592  | 0.0573532   | 800     | 7        |
| 4   | 15077 | W   | 0.210815    | 0.294016  | 0.0815613   | 80      | 5        |
| 4   | 15077 | C   | 0.228909    | 0.165362  | 0.0389922   | 930     | 11       |
| 4   | 15291 | W   | 0.0952999   | 0.112246  | 0.0241634   | 262     | 17       |
| 4   | 15291 | C   | 0.11193     | 0.112212  | 0.0286301   | 592     | 18       |
| 4   | 15405 | W   | 0.122235    | 0.123266  | 0.0265472   | 569     | 15       |
| 4   | 15405 | C   | 0.103456    | 0.0926053 | 0.0198511   | 763     | 22       |
| 4   | 16301 | W   | 0.0337529   | 0.0238267 | 0.00324817  | 987     | 91       |
| 4   | 16301 | C   | 0.0284825   | 0.0258301 | 0.00453163  | 793     | 90       |
| 4   | 16616 | W   | 0.0987236   | 0.139429  | 0.0321978   | 45      | 13       |
| 4   | 16616 | C   | 0.131379    | 0.109607  | 0.0247594   | 845     | 18       |
| 4   | 16747 | W   | 0.608741    | 0.229102  | 0.0620424   | 1000    | 7        |
| 4   | 16747 | C   | 0.312581    | 0.231202  | 0.0601837   | 919     | 7        |
| 4   | 16758 | W   | 0.0892111   | 0.107639  | 0.0254762   | 232     | 18       |
| 4   | 16758 | C   | 0.108081    | 0.0997762 | 0.0216606   | 712     | 20       |
| 4   | 16773 | W   | 0.0472746   | 0.0328362 | 0.00528212  | 981     | 66       |
| 4   | 16773 | C   | 0.0396203   | 0.036579  | 0.00688912  | 759     | 62       |
| 4   | 16779 | W   | 0.0808354   | 0.0886275 | 0.0177636   | 379     | 22       |
| 4   | 16779 | C   | 0.0886001   | 0.122214  | 0.0282606   | 51      | 16       |
| 4   | 16789 | W   | 0.196734    | 0.159638  | 0.0390374   | 867     | 11       |
| 4   | 16789 | C   | 0.130747    | 0.121507  | 0.0281815   | 699     | 16       |
| 4   | 16818 | W   | 0.0707813   | 0.0636646 | 0.0121313   | 770     | 32       |
| 4   | 16818 | C   | 0.0999115   | 0.0801637 | 0.0163089   | 887     | 26       |
| 4   | 16820 | W   | 0.294318    | 0.206485  | 0.0526063   | 933     | 8        |
| 4   | 16820 | C   | 0.17155     | 0.120918  | 0.0272221   | 951     | 16       |
| 4   | 16836 | W   | 0.28153     | 0.25623   | 0.0713785   | 730     | 6        |
| 4   | 16836 | C   | 0.174081    | 0.145736  | 0.0346181   | 823     | 13       |
| 4   | 16881 | W   | 0.284257    | 0.298884  | 0.0815264   | 535     | 5        |
| 4   | 16881 | C   | 0.252904    | 0.151656  | 0.0347388   | 981     | 12       |
| 4   | 19001 | W   | 0.0891474   | 0.0934613 | 0.0214568   | 515     | 21       |
| 4   | 19001 | C   | 0.159834    | 0.144245  | 0.0326452   | 748     | 13       |
| 4   | 30554 | W   | 0.0175082   | 0.0160527 | 0.0019055   | 809     | 142      |
| 4   | 30554 | C   | 0.0165178   | 0.0178253 | 0.00315113  | 402     | 135      |
| 4   | 42578 | W   | 0.0751362   | 0.101486  | 0.0225922   | 56      | 19       |
| 4   | 42578 | C   | 0.121264    | 0.0733666 | 0.015393    | 986     | 29       |
| 4   | 46914 | W   | 0.0469888   | 0.0406314 | 0.00644743  | 855     | 52       |
| 4   | 46914 | C   | 0.0415339   | 0.0428242 | 0.0079099   | 511     | 52       |

Table 19: Results for gene classes taken from level 4 of the Gene Ontology heirarchy on chromosome 4 using TIGR data with the tandem duplications removed

| Chr | Class | Std | Orig. Grnwd | MC Grnwd  | SD MC grnwd | Ranking | Examples |
|-----|-------|-----|-------------|-----------|-------------|---------|----------|
| 5   | 04175 | W   | 0.0602489   | 0.0578787 | 0.0120805   | 653     | 39       |
| 5   | 04175 | C   | 0.049675    | 0.0620271 | 0.0137616   | 163     | 37       |
| 5   | 04518 | W   | 0.0794314   | 0.0924232 | 0.0228543   | 310     | 23       |
| 5   | 04518 | C   | 0.0785277   | 0.103793  | 0.0255301   | 93      | 20       |
| 5   | 04553 | W   | 0.0927926   | 0.0657474 | 0.0137978   | 952     | 33       |
| 5   | 04553 | C   | 0.0488214   | 0.0572722 | 0.012288    | 254     | 40       |
| 5   | 04930 | W   | 0.0925231   | 0.117402  | 0.0302261   | 182     | 17       |
| 5   | 04930 | C   | 0.174387    | 0.201923  | 0.0559239   | 360     | 9        |
| 5   | 05216 | W   | 0.129782    | 0.184684  | 0.0522799   | 61      | 10       |
| 5   | 05216 | C   | 0.106138    | 0.096063  | 0.022006    | 762     | 22       |
| 5   | 05351 | W   | 0.162189    | 0.138181  | 0.0345115   | 815     | 14       |
| 5   | 05351 | C   | 0.205858    | 0.243485  | 0.0697066   | 346     | 7        |
| 5   | 05509 | W   | 0.0671803   | 0.0673656 | 0.0146473   | 604     | 32       |
| 5   | 05509 | C   | 0.0688808   | 0.0751554 | 0.0160773   | 404     | 29       |
| 5   | 08168 | W   | 0.0936445   | 0.0827125 | 0.0185907   | 771     | 26       |
| 5   | 08168 | C   | 0.11064     | 0.118881  | 0.0275203   | 455     | 17       |
| 5   | 08234 | W   | 0.0963299   | 0.100237  | 0.0258597   | 546     | 21       |
| 5   | 08234 | C   | 0.109508    | 0.153285  | 0.0423915   | 89      | 13       |
| 5   | 08236 | W   | 0.0787365   | 0.076426  | 0.0172648   | 648     | 28       |
| 5   | 08236 | C   | 0.106795    | 0.0959824 | 0.0233556   | 746     | 22       |
| 5   | 08237 | W   | 0.135089    | 0.112475  | 0.0284624   | 826     | 18       |
| 5   | 08237 | C   | 0.137204    | 0.111444  | 0.0268743   | 864     | 19       |
| 5   | 08238 | W   | 0.172127    | 0.148829  | 0.0381274   | 803     | 13       |
| 5   | 08238 | C   | 0.143806    | 0.151473  | 0.0415583   | 523     | 13       |
| 5   | 15077 | W   | 0.179947    | 0.201872  | 0.0586895   | 431     | 9        |
| 5   | 15077 | C   | 0.191129    | 0.120371  | 0.0301801   | 971     | 17       |
| 5   | 15291 | W   | 0.0407779   | 0.0488679 | 0.0105603   | 202     | 46       |
| 5   | 15291 | C   | 0.0580766   | 0.0585064 | 0.012613    | 564     | 39       |
| 5   | 15405 | W   | 0.108183    | 0.102527  | 0.0240083   | 674     | 20       |
| 5   | 15405 | C   | 0.10619     | 0.0783856 | 0.0175298   | 936     | 28       |
| 5   | 16301 | W   | 0.0306068   | 0.018271  | 0.00324143  | 992     | 133      |
| 5   | 16301 | C   | 0.0220163   | 0.0173014 | 0.00340377  | 910     | 151      |
| 5   | 16616 | W   | 0.0801271   | 0.0833716 | 0.0183193   | 503     | 25       |
| 5   | 16616 | C   | 0.0957847   | 0.100318  | 0.0237078   | 514     | 21       |
| 5   | 16747 | W   | 0.174295    | 0.140148  | 0.0360842   | 860     | 14       |
| 5   | 16747 | C   | 0.209899    | 0.133287  | 0.0345469   | 970     | 15       |
| 5   | 16758 | W   | 0.116678    | 0.0937626 | 0.0214066   | 885     | 22       |
| 5   | 16758 | C   | 0.20706     | 0.0861903 | 0.0188635   | 1000    | 25       |
| 5   | 16773 | W   | 0.0374379   | 0.0236634 | 0.00432713  | 992     | 101      |
| 5   | 16773 | C   | 0.0251962   | 0.0227385 | 0.00478526  | 781     | 112      |
| 5   | 16779 | W   | 0.0791245   | 0.0899414 | 0.0204316   | 337     | 23       |
| 5   | 16779 | C   | 0.14305     | 0.118783  | 0.0294427   | 828     | 17       |
| 5   | 16789 | W   | 0.0927072   | 0.0763825 | 0.0170208   | 850     | 28       |
| 5   | 16789 | C   | 0.0679968   | 0.0860694 | 0.019992    | 134     | 25       |
| 5   | 16818 | W   | 0.067962    | 0.0487938 | 0.00959897  | 956     | 46       |
| 5   | 16818 | C   | 0.0499645   | 0.0406861 | 0.00890985  | 867     | 59       |
| 5   | 16820 | W   | 0.144629    | 0.146245  | 0.0387674   | 599     | 13       |
| 5   | 16820 | C   | 0.113412    | 0.0921847 | 0.0211511   | 866     | 23       |
| 5   | 16836 | W   | 0.152897    | 0.169911  | 0.045352    | 415     | 11       |
| 5   | 16836 | C   | 0.191063    | 0.223132  | 0.065604    | 356     | 8        |
| 5   | 16881 | W   | 0.389263    | 0.30803   | 0.0899876   | 837     | 5        |
| 5   | 16881 | C   | 0.1838      | 0.17098   | 0.0478417   | 704     | 11       |
| 5   | 19001 | W   | 0.0920855   | 0.074159  | 0.0167015   | 876     | 29       |
| 5   | 19001 | C   | 0.138827    | 0.0829745 | 0.0194841   | 984     | 26       |
| 5   | 30554 | W   | 0.0176474   | 0.0106649 | 0.00150047  | 998     | 235      |
| 5   | 30554 | C   | 0.0162879   | 0.0107516 | 0.00193222  | 980     | 250      |
| 5   | 42578 | W   | 0.0690198   | 0.0755282 | 0.0161162   | 392     | 28       |
| 5   | 42578 | C   | 0.0603234   | 0.0627738 | 0.0136233   | 515     | 36       |
| 5   | 46914 | W   | 0.0358101   | 0.0241335 | 0.00444273  | 979     | 99       |
| 5   | 46914 | C   | 0.0382661   | 0.0304407 | 0.00663895  | 880     | 82       |

Table 20: Results for gene classes taken from level 4 of the Gene Ontology heirarchy on chromosome 5 using TIGR data with the tandem duplications removed
